# Supplementary material
Source: JCI journal article supplement (doi:10.1172/jci171417)
Supplement: sd1 [file 1]

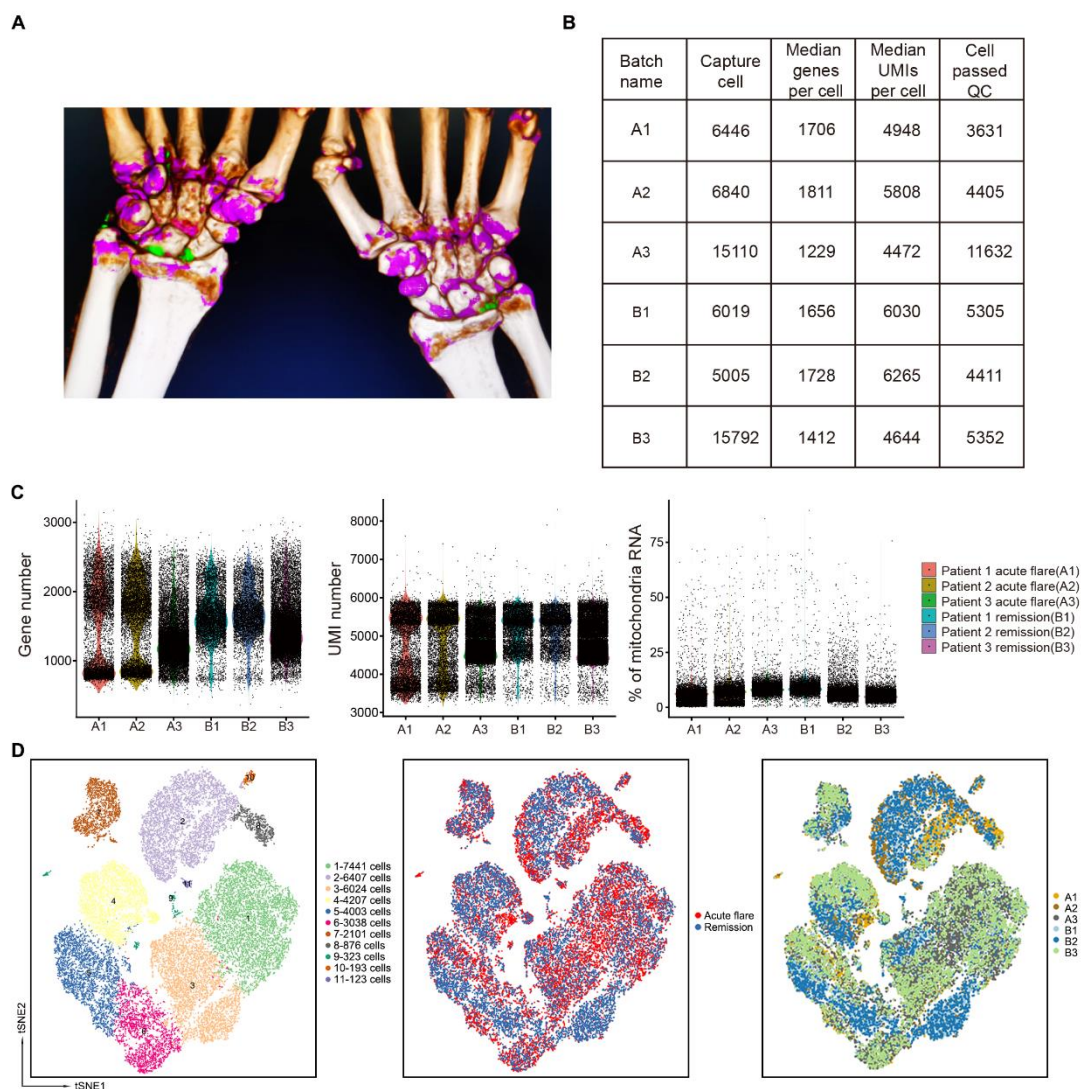

**Supplemental Figure 1 Quality control of single-cell data for PBMC samples from gout patients.** (A) Dual energy CT picture of gout patient. (B) Summary of captured cells, median genes per cell, median UMIs per cell, and the number of cells that passed quality control (QC) in distinct batches of single-cell data from gout patients. (C) Box plots showing the gene number (top panel), UMI number (bottom left panel), and percentage of mitochondrial RNA (bottom right panel) in distinct batches of single-cell data from gout patients. (D) tSNE of the total cells profiled here, with each cell color-coded for: the clusters (left), the group (median), the corresponding patient(right).

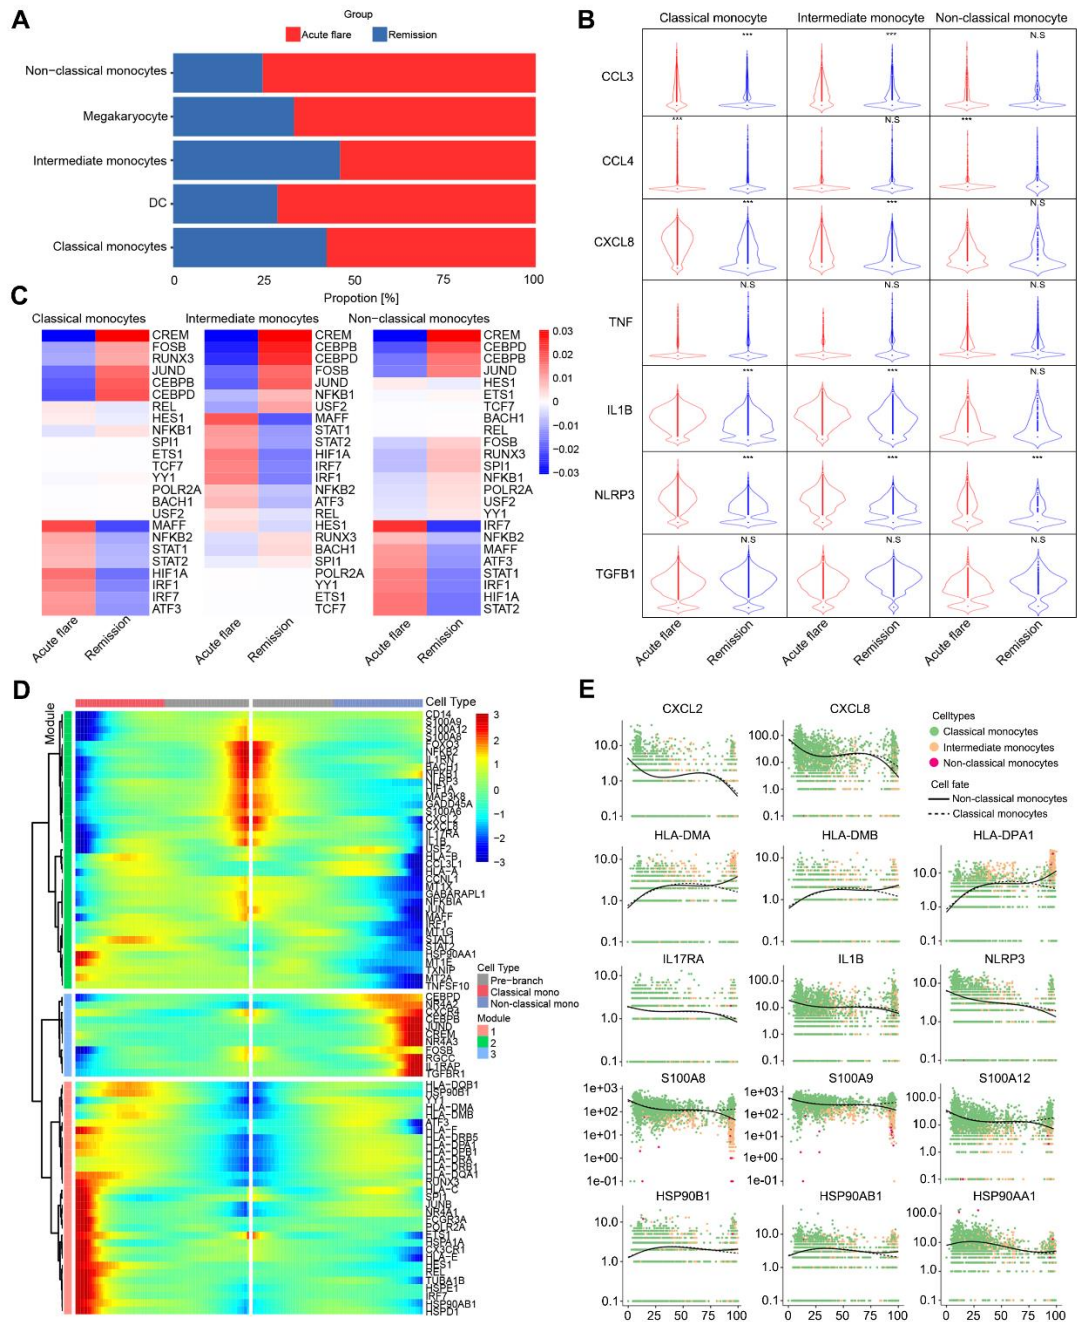

**Supplemental Figure 2 Detailed characterization of monocyte subtypes from the gout flare and remission of gout.** (A) Bar plot of cell fractions of myeloid subtypes stratified by groups. (B) Violin plots of the average expression of genes involved in the inflammatory cytokines in each monocyte subtypes from gout flare and remission.  $P$  values were calculated using two-sided Wilcoxon rank-sum tests. Data are from single-cell transcriptomes of 3 independent gout patients. \*\*\*  $P < 0.001$  (C) Heatmap of the  $t$  values of AUC scores of expression regulation by transcription factors in each monocyte subtypes from gout flare and remission, as estimated using SCENIC. (D) Gene expression changes of selected marker genes as a function of pseudotime reflecting the cellular differentiation. (E) DEG analysis as a function of pseudotime in a branch-dependent manner showing a common gene signature of a pre-branch precursor cell population choosing two main cell fates.

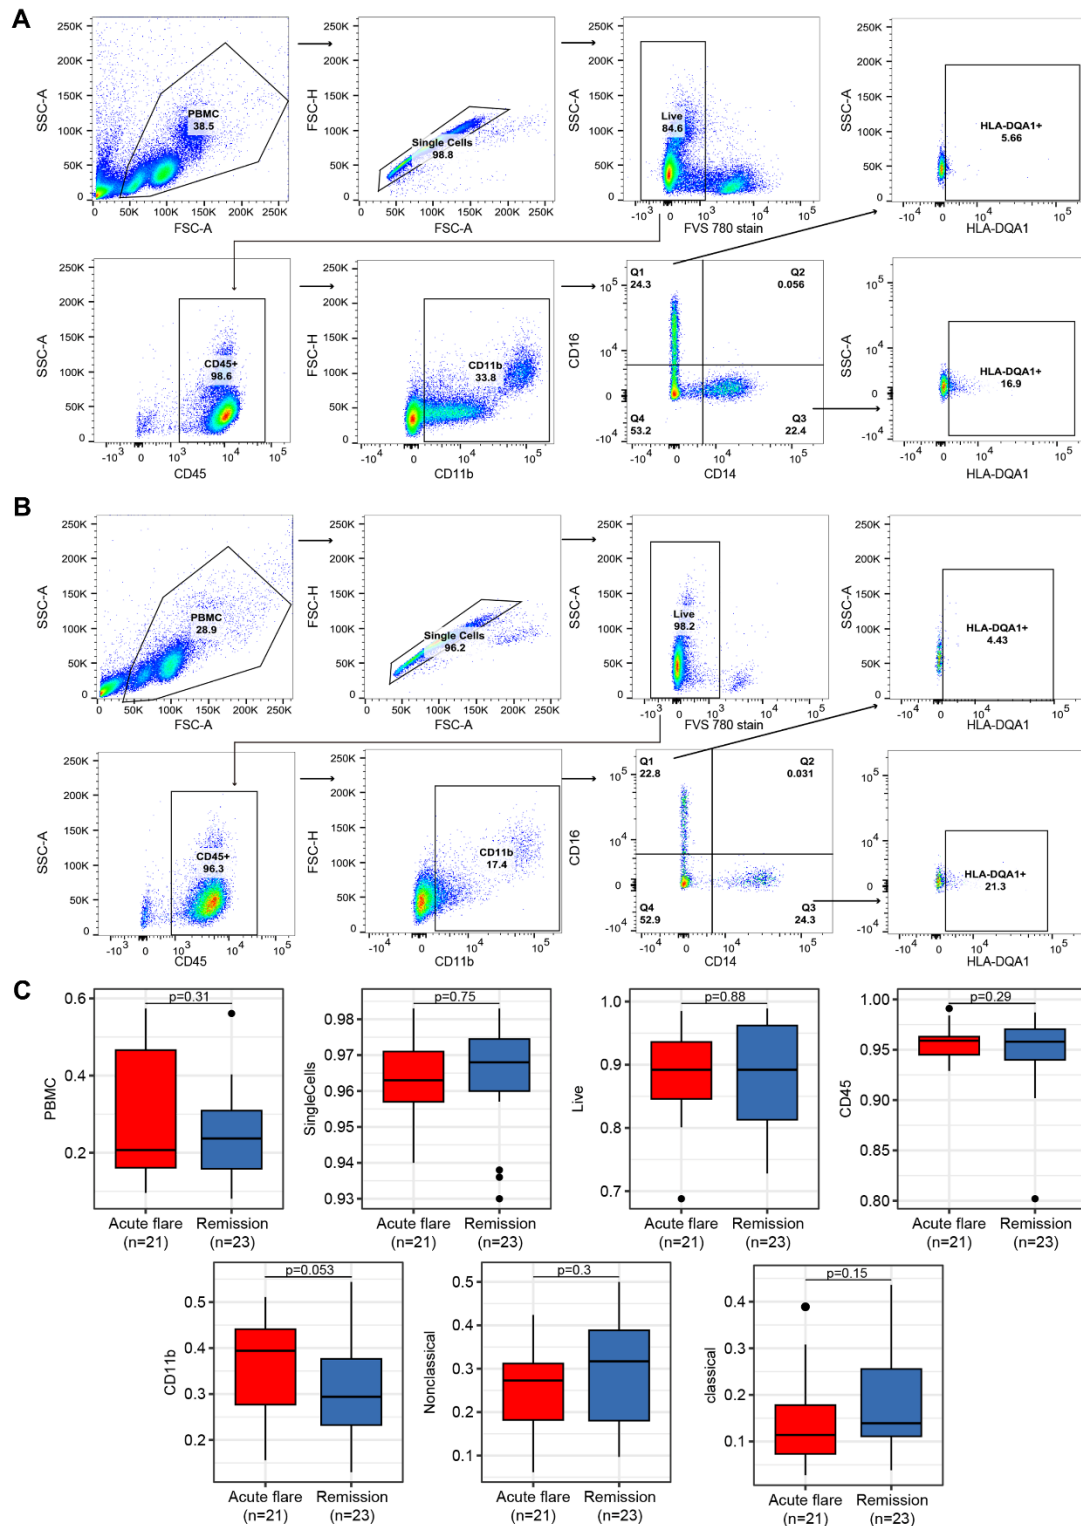

**Supplemental Figure 3 Flow cytometry of monocyte subtypes from the gout flare and remission of gout.** (A-B) Percentages of PBMCs, single cells, live cells, CD45<sup>+</sup> cells, CD11b<sup>+</sup> cells, classical monocytes, HLA-DQA1<sup>+</sup> classical monocytes, non-classical monocytes and HLA-DQA1<sup>+</sup> non-classical monocytes in gout flare (A) and gout remission patients (B). Cells were gated on lymphocytes and one representative flow cytometry chart from each group is shown. (C) Box plots of the percentages of monocyte subtypes. The box represents the interquartile range (IQR). The horizontal line inside the box represents the median. The whiskers extend from the box, indicating

the data range without outliers. Outliers are shown as individual points beyond the whiskers and defined as values outside 1.5 times the IQR range. Statistical analysis was undertaken using a 2-tailed Student's t test.

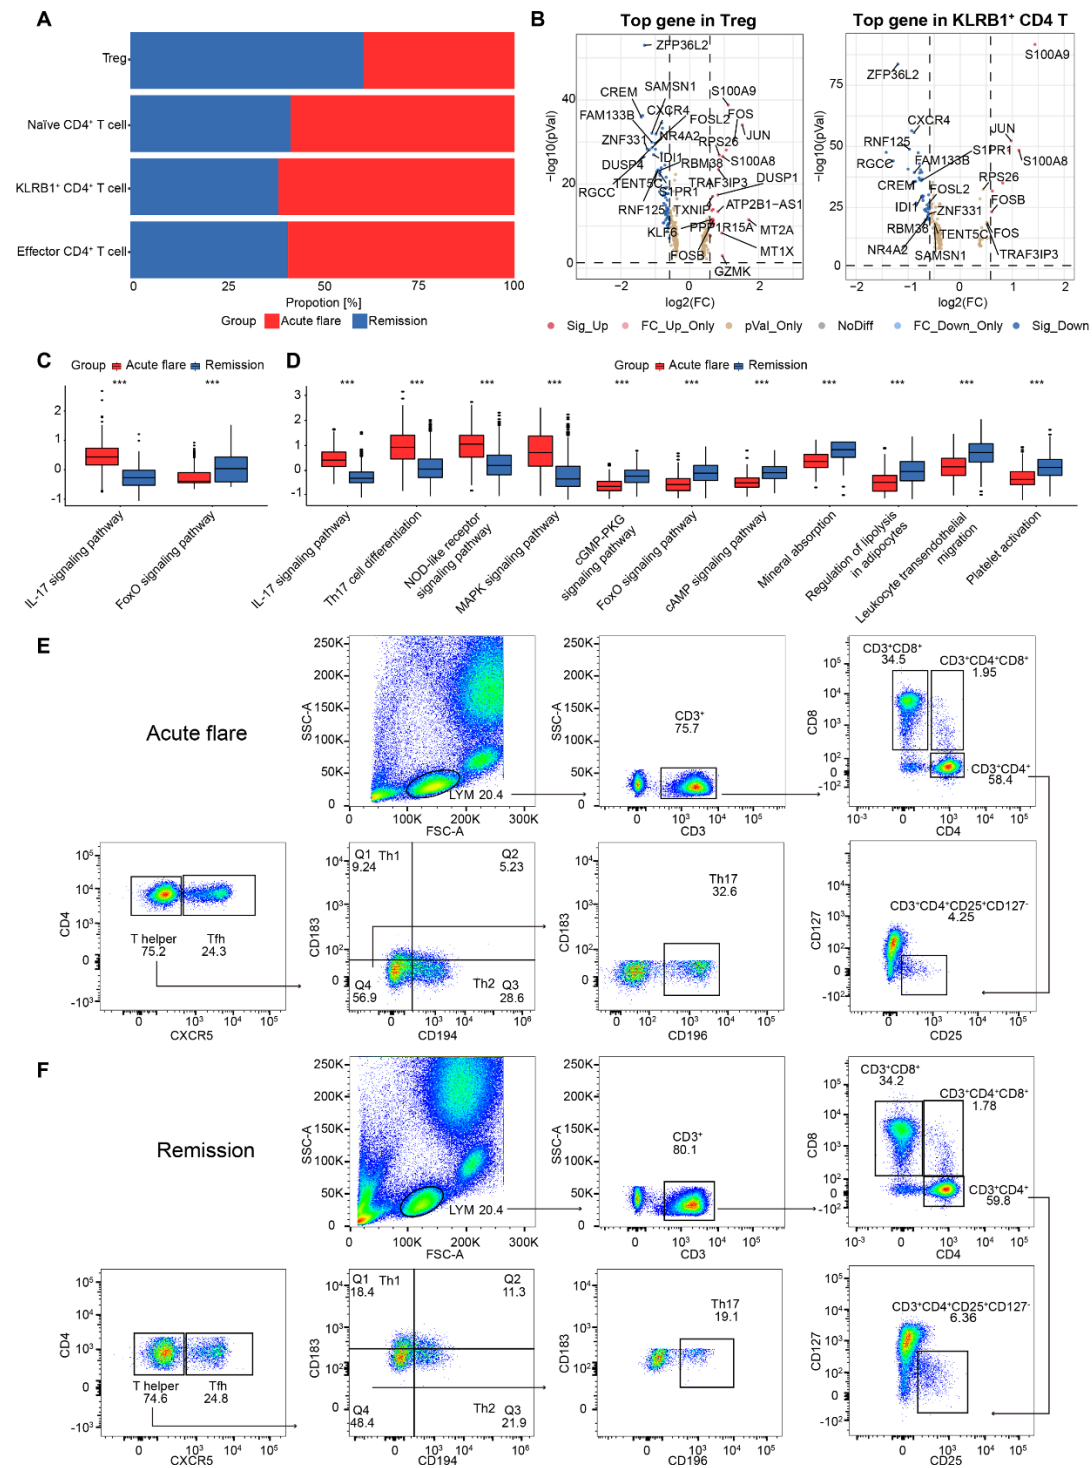

**Supplemental Figure 4 The role of CD4+ T cell subtypes in gout flare and remission. (A)** Bar plot of cell fractions of CD4+ TC subtypes stratified by groups. **(B)** The volcano plot represents the top differentially expressed genes of KLRB1+ CD4+ TC and Treg cells between gout flare and remission. **(C-D)** Box plots of the expression of genes involved in the top KEGG pathways term of KLRB1+ CD4+ TCs **(C)** and Treg cells **(D)** between gout flare and remission. *P* values were

determined by the Wilcoxon rank-sum tests. Data are from single-cell transcriptomes of 3 independent gout patients. \*\*\*  $P < 0.001$  (E-F) Percentages of TCs, CD4<sup>+</sup> TCs, Th1 cells, Th2 cells, Th17 cells, and Treg in gout flare patients (E) and gout remission patients (F). Cells were gated on lymphocytes and one representative flow cytometry chart from each group is shown.

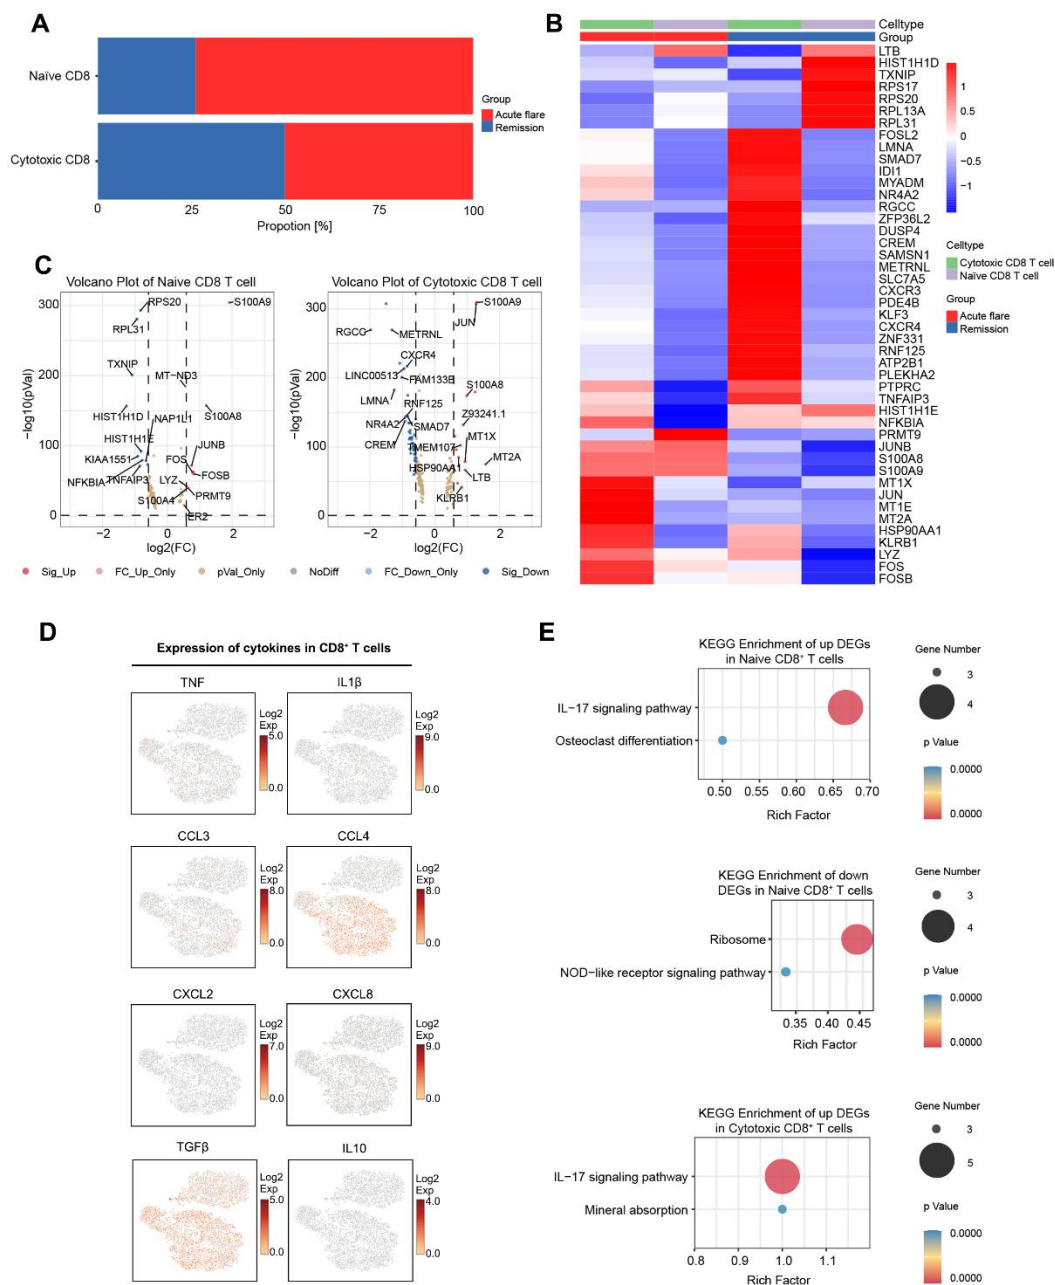

**Supplemental Figure 5 The role of CD8<sup>+</sup> T cell subtypes in gout flare and remission. (A)** Bar plot of cell fractions of CD8<sup>+</sup> TC subtypes stratified by groups. **(B)** Heatmaps of DE genes between CD8<sup>+</sup> TC subtypes of gout flare compared to remission of gout. The heatmap is colored by average  $\log(\text{FC})$ . All displayed genes and regulators are statistically significant at the  $P < 0.05$ . **(C)** The volcano plot represents the top differentially expressed genes of naïve CD8<sup>+</sup> TCs and cytotoxic CD8<sup>+</sup> TCs between gout flare and remission. **(D)** tSNE plots showing the expression of selected cytokines in CD8<sup>+</sup> TC subtypes. **(E)** Naïve CD8<sup>+</sup> TCs and cytotoxic CD8<sup>+</sup> TCs functional enrichment analysis with KEGG of each monocyte subtypes were performed with up and down

regulated genes.

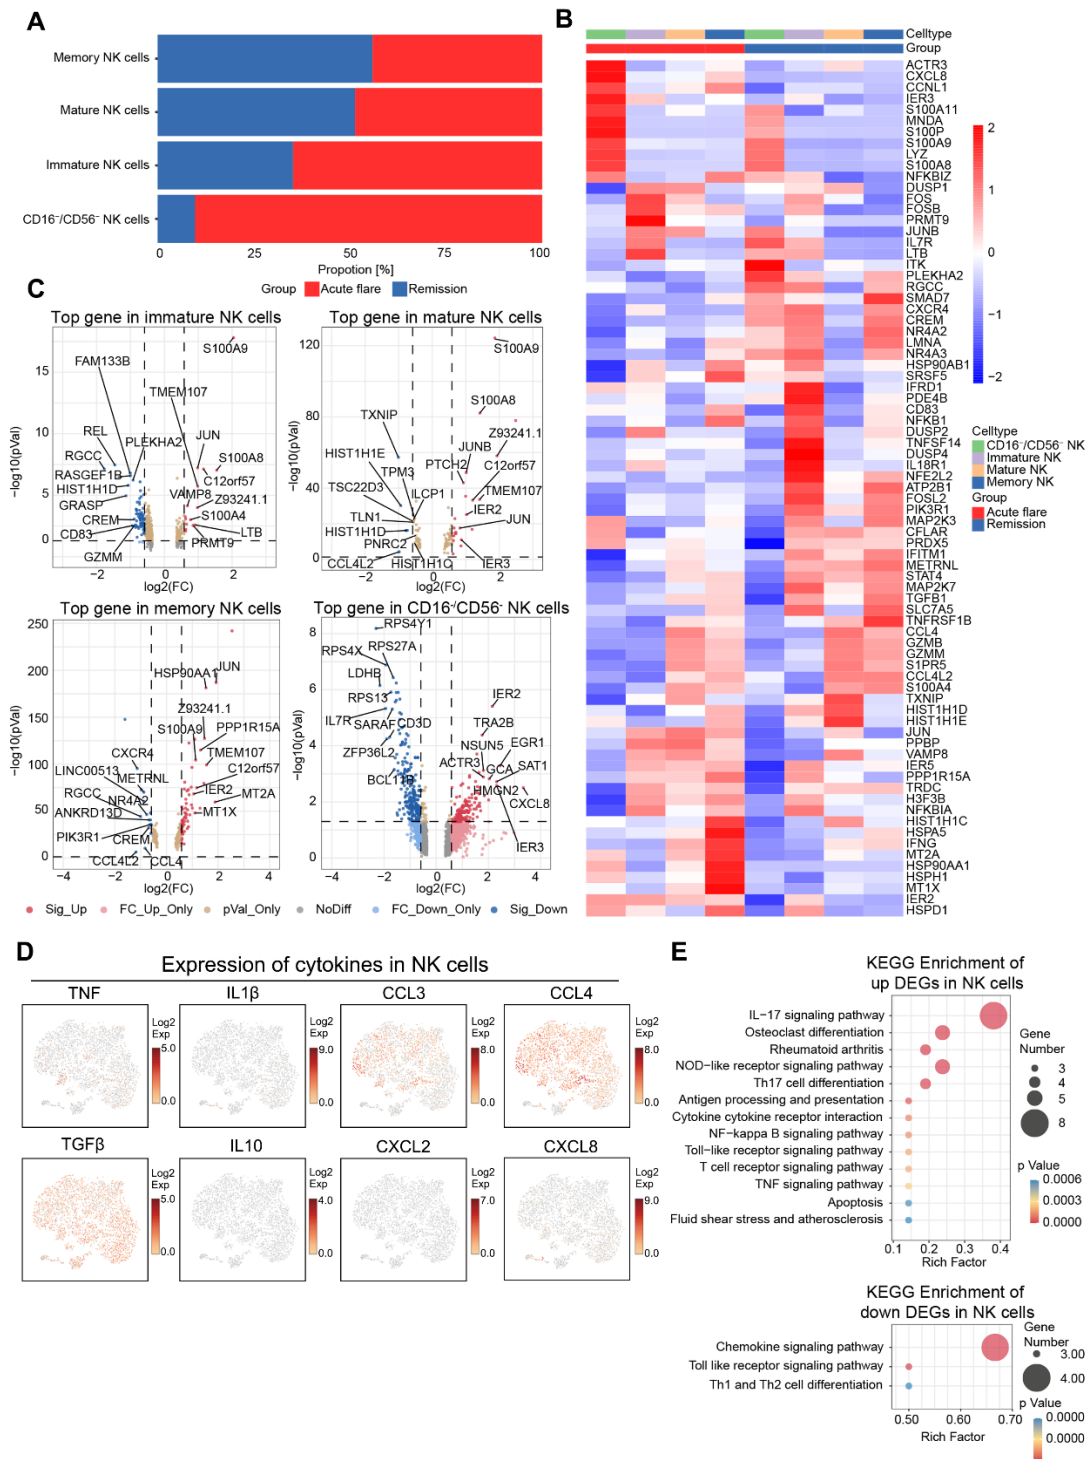

**Supplemental Figure 6 The role of NK cells subtypes in gout flare and remission.** (A) Bar plot of cell fractions of NK cell subtypes stratified by groups. (B) Heatmaps of DE genes between NK cell subtypes of gout flare compared to remission of gout. The heatmap is colored by average  $\log_2(\text{FC})$ . All displayed genes and regulators are statistically significant at the  $P < 0.05$ . (C) The volcano plot represents the top differentially expressed genes of NK cell subtypes between gout flare and remission. (D) tSNE plots showing the expression of selected cytokines in NK cell subtypes. (E) NK cells functional enrichment analysis with KEGG of each monocyte subtypes were

performed with up and down regulated genes.

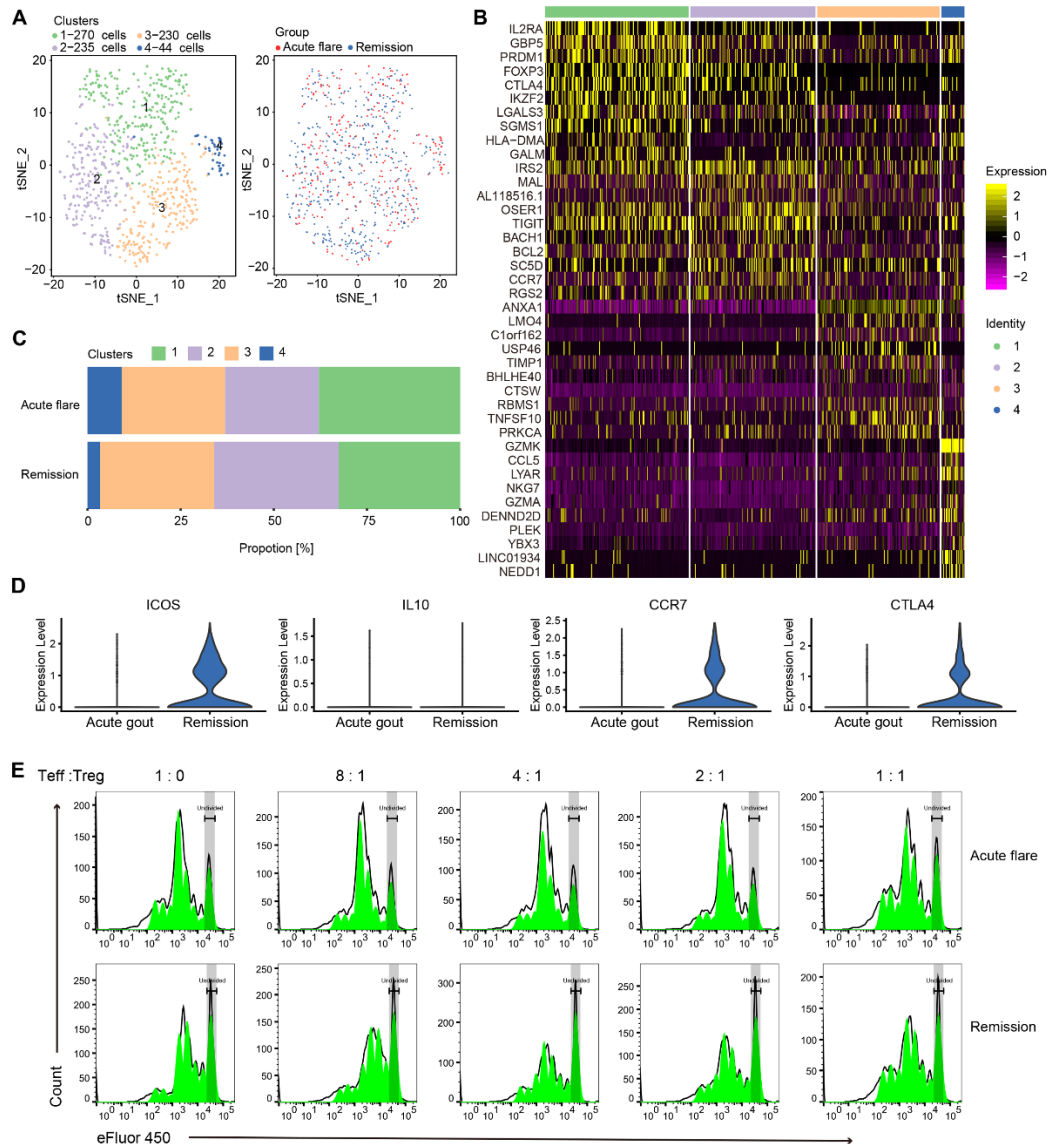

**Supplemental Figure 7 The role of Treg cell subtypes in gout flare and remission.** (A) t-SNE representations of integrated single-cell transcriptomes of Treg cells, cells are color-coded by clusters and disease state. (B) Heatmap of all clusters from Treg cells after dimensional reduction. Top 100 marker genes were used and colored by their expression level. (C) Bar plot showing cell fractions of Treg subtypes in patients with gout flare and gout remission, color coded for cell clusters. (D) Violin plots of the average expression of genes involved in the function in Treg cells from gout flare and remission. (E) Treg cell suppression assay. Sorted Tregs ( $CD4^+CD25^+CD127^-$ ) were co-cultured with eFluor 450-labeled Teffs ( $CD4^+CD25^-$ ) at different Treg-to-Teff ratios in the presence of anti-CD3/CD28 beads. The percentages of divided T cells are shown in each histogram plot.

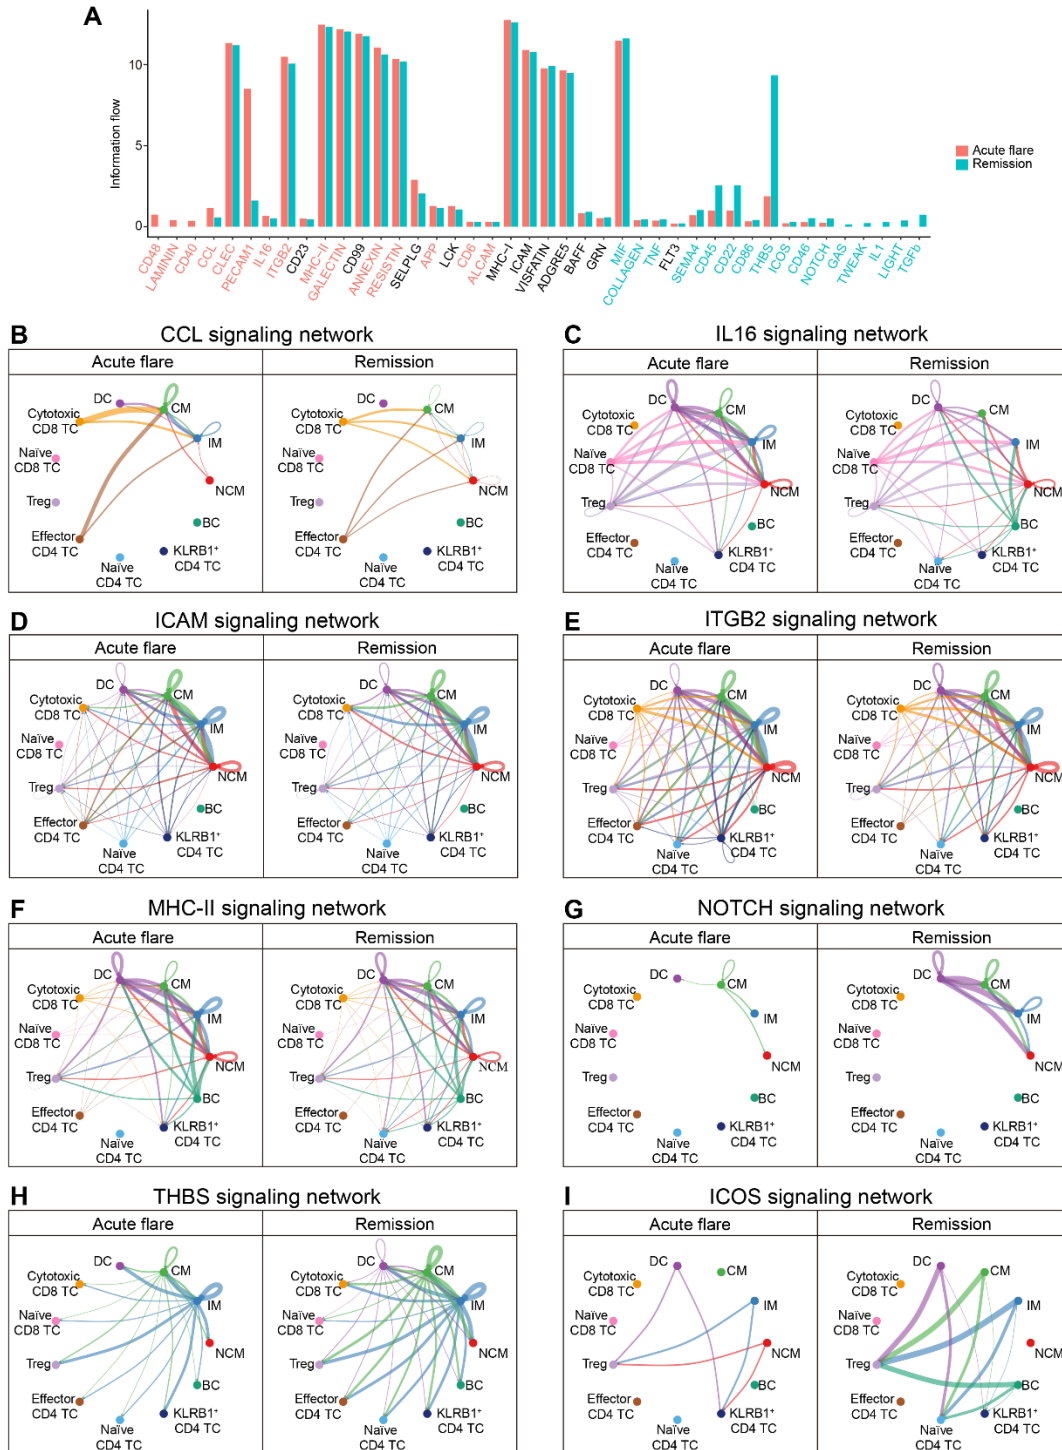

**Supplemental Figure 8** Some cell–cell communications mediated by signaling pathways are greatly altered in gout flare compared with remission. (A) Significant signaling pathways were ranked based on differences in the overall information flow within the inferred networks between gout flare and remission. The overall information flow of a signaling network is calculated by summarizing all communication probabilities in that network. Red-colored labels are more enriched in the gout flare, black-colored labels are equally enriched in gout flare and remission, blue-colored labels are enriched in gout remission. Circle plots show and compare cell–cell communication alterations between gout flare and remission mediated by some of the signaling axes, including C-

C Motif Chemokine Ligand (CCL) (B), IL16 (C), Intercellular Adhesion Molecule (ICAM) (D), Integrin Subunit (ITGB2) (E), Class II Major Histocompatibility Complex (MHC-II) (F), NOTCH (G), Thrombospondin (THBS) (H) and Inducible T Cell Costimulator (ICOS) (I).

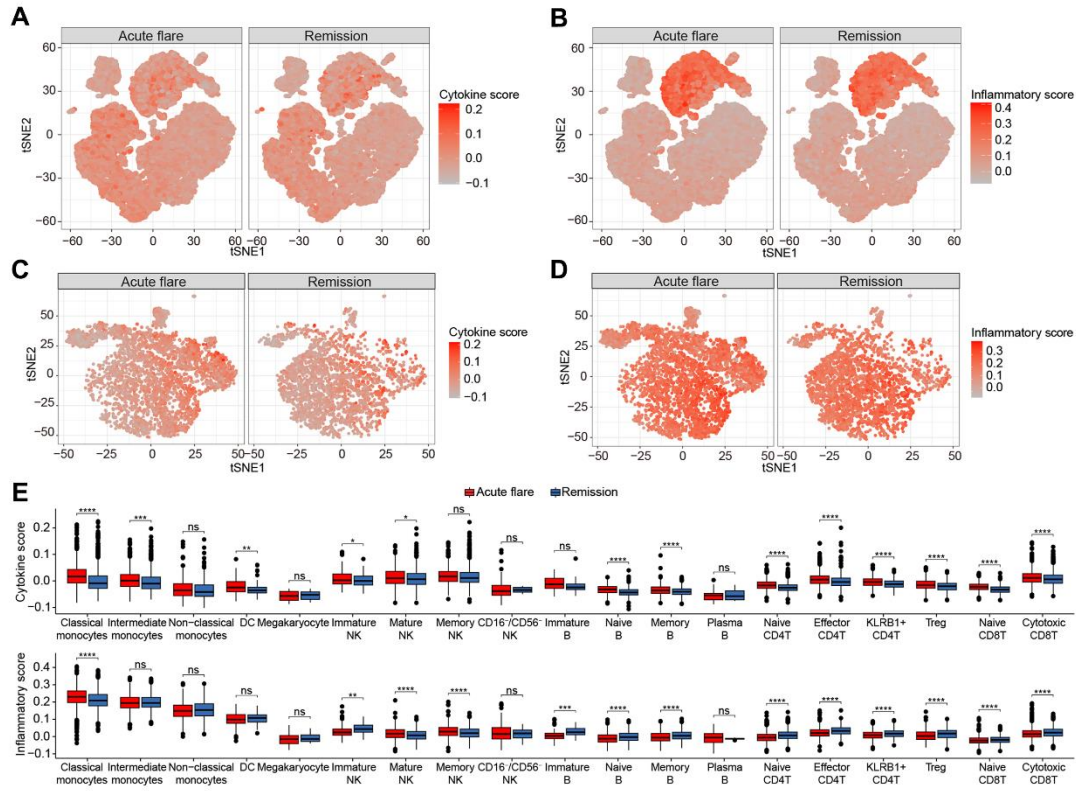

**Supplemental Figure 9 Inflammatory score and cytokine score of cell subtypes between gout flare and remission.** (A-B) t-SNE plots of PBMCs colored by cytokine score (A), and inflammatory score (B). (C-D) t-SNE plots of myeloid cells colored by cytokine score (C), and inflammatory score (D). (E) Boxplots of the cytokine score (top panel) and inflammatory score (bottom panel) of cell subtypes. Significance was evaluated with the t-test. Data are from single-cell transcriptomes of 3 independent gout patients. \*  $P < 0.05$ , \*\*  $P < 0.01$ , \*\*\*  $P < 0.001$ , \*\*\*\*  $P < 0.0001$ .

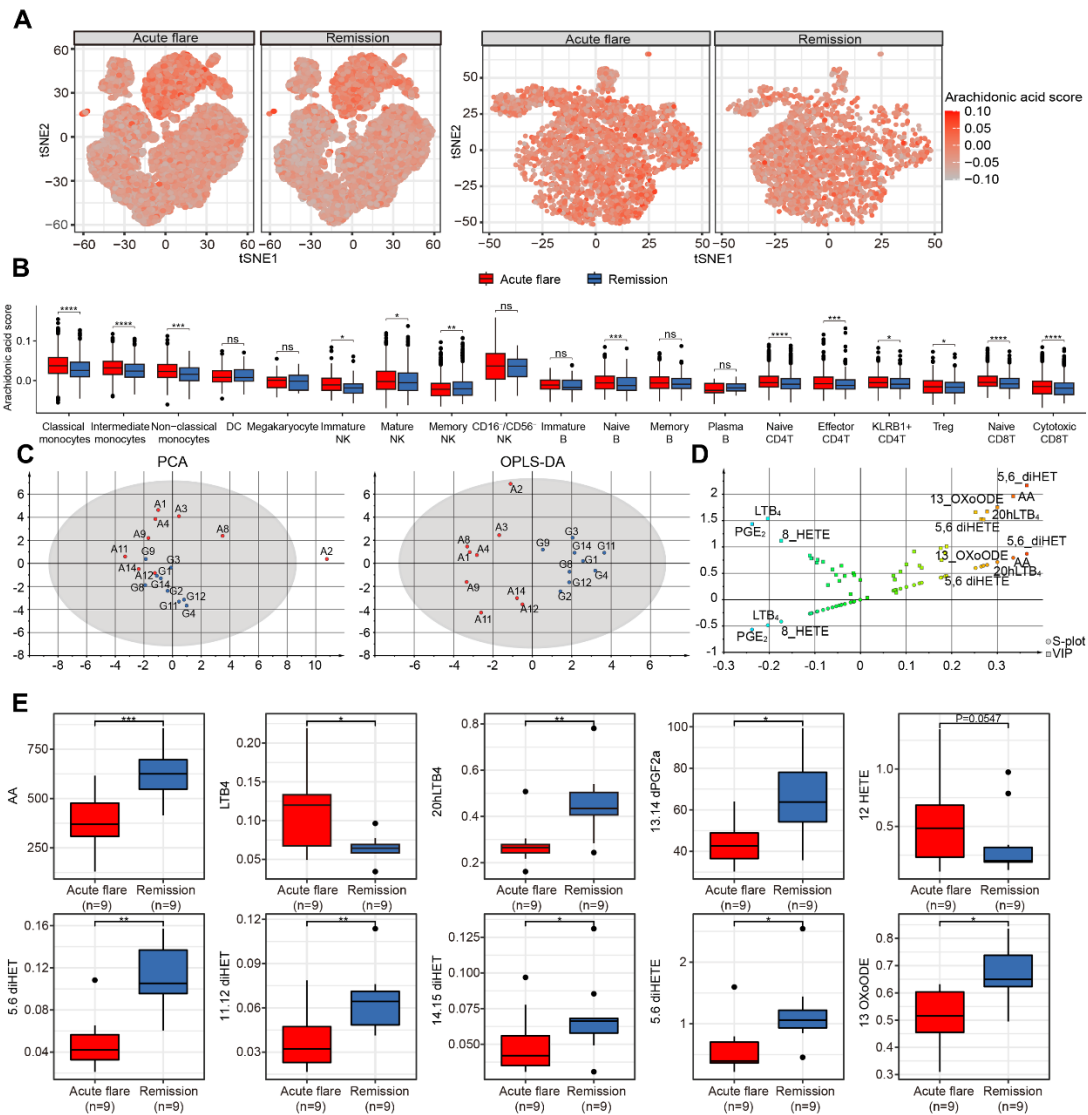

**Supplemental Figure 10 Detailed characterization of arachidonic acid metabolic activity for the gout flare and remission.** (A) t-SNE plots of PBMCs (left panel) and myeloid cells (right panel) colored by arachidonic acid score in gout flare and remission. (B) Boxplots of the arachidonic acid score of cell subtypes. Significance was evaluated with the t-test. Data are from single-cell transcriptomes of 3 independent gout patients. \*  $P < 0.05$ , \*\*  $P < 0.001$ , \*\*\*  $P < 0.001$ , \*\*\*\*  $P < 0.0001$ . (C) 2D PCA score plots and 2D scatter plot for the orthogonal projections to latent structures discriminant analysis (OPLS-DA) show visual separation of gout flare (red dots) from the remission (blue dots). (D) S-plot and VIP value of the analysis of OPLS-DA. (E) Plasma levels of ten significant expressed metabolites from gout flare ( $n = 9$ ) and remission ( $n = 9$ ) patients. The box represents the interquartile range (IQR). The horizontal line inside the box represents the median. The whiskers extend from the box, indicating the data range without outliers. Outliers are shown as individual points beyond the whiskers and defined as values outside 1.5 times the IQR range. Statistical analysis was undertaken using a 2-tailed Student's t test. \*  $P < 0.05$ , \*\*  $P < 0.001$ , \*\*\*  $P < 0.001$ .

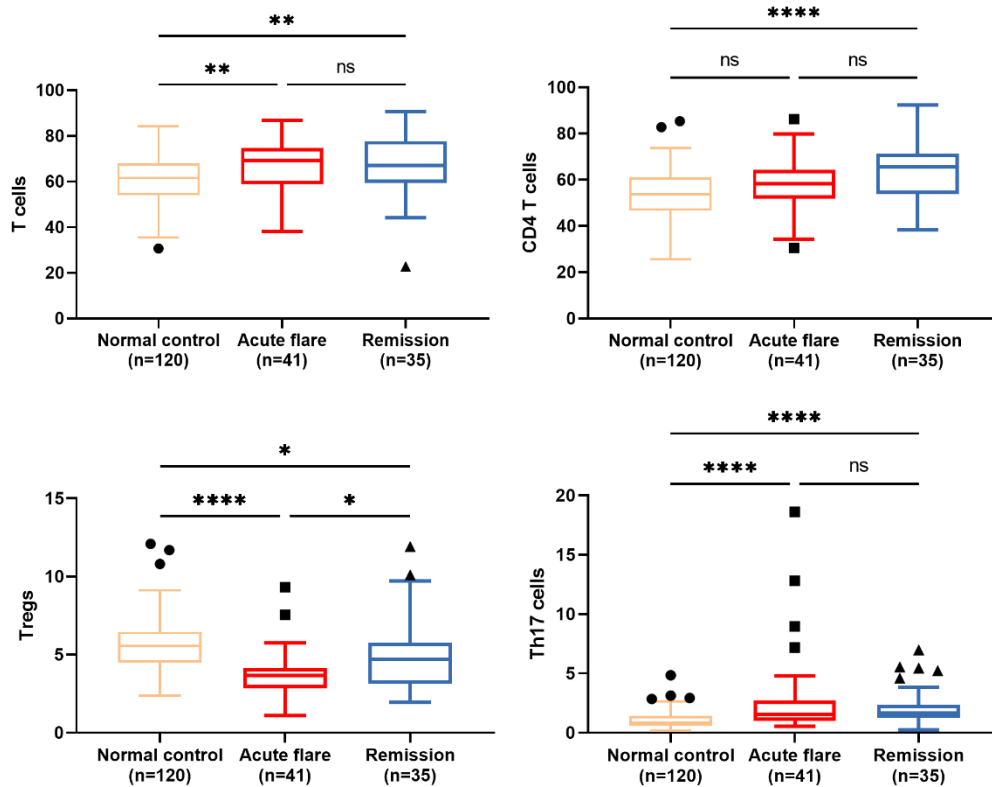

**Supplemental Figure 11 Flow cytometry of CD4<sup>+</sup> T cells subtypes in normal control, gout flare and remission.** Boxplots of the percentages of T cells, CD4<sup>+</sup> T cells, Th17 cells and Treg in normal control (n = 120), gout flare (n = 41) and remission (n = 35) patients. The box represents the interquartile range (IQR). The horizontal line inside the box represents the median. The whiskers extend from the box, indicating the data range without outliers. Outliers are shown as individual points beyond the whiskers and defined as values outside 1.5 times the IQR range. Statistical analysis was done using the Kruskal-Wallis test followed by Dunn's multiple comparison correction. \*  $P < 0.05$ , \*\*  $P < 0.001$ , \*\*\*\*  $P < 0.0001$

Supplemental Table 1 Percentages of monocyte subtypes between gout flare and remission by flow cytometry

| Number                   | Sample ID | group       | PBMC   | SingleCells | Live   | CD45+  | CD11b+ | Nonclassical | Nonclassical+,HLA-DQA1+ | classical | Classical+,HLA-DQA1+ |
|--------------------------|-----------|-------------|--------|-------------|--------|--------|--------|--------------|-------------------------|-----------|----------------------|
| Specimen_001_A11_066.fcs | AG11      | Acute flare | 39.00% | 95.50%      | 97.10% | 98.20% | 39.40% | 26.30%       | 7.14%                   | 38.90%    | 8.41%                |
| Specimen_001_A14_017.fcs | AG14      | Acute flare | 31.50% | 97.50%      | 98.50% | 96.30% | 15.60% | 17.30%       | 5.98%                   | 30.80%    | 19.10%               |
| Specimen_001_A16_057.fcs | AG16      | Acute flare | 55.90% | 97.10%      | 96.70% | 98.30% | 32.40% | 6.18%        | 8.04%                   | 7.87%     | 9.01%                |
| Specimen_001_A21_070.fcs | AG21      | Acute flare | 57.40% | 98.20%      | 86.80% | 95.60% | 27.10% | 27.50%       | 3.10%                   | 2.77%     | 5.34%                |
| Specimen_001_A23_071.fcs | AG23      | Acute flare | 16.10% | 96.00%      | 89.10% | 96.10% | 27.20% | 42.40%       | 3.01%                   | 19.00%    | 5.02%                |
| Specimen_001_A24_072.fcs | AG24      | Acute flare | 20.70% | 96.40%      | 89.70% | 92.90% | 28.40% | 18.20%       | 6.12%                   | 7.34%     | 10.50%               |
| Specimen_001_A33_078.fcs | AG33      | Acute flare | 16.40% | 96.20%      | 92.30% | 94.00% | 27.70% | 38.20%       | 10.30%                  | 11.40%    | 10.50%               |
| Specimen_001_A36_080.fcs | AG36      | Acute flare | 18.20% | 94.00%      | 87.40% | 96.10% | 51.10% | 30.40%       | 15.00%                  | 13.00%    | 10.20%               |
| Specimen_001_A40_019.fcs | AG40      | Acute flare | 55.80% | 97.90%      | 97.40% | 99.10% | 45.60% | 27.30%       | 2.05%                   | 22.40%    | 11.40%               |
| Specimen_001_A41_083.fcs | AG41      | Acute flare | 34.70% | 95.70%      | 68.80% | 96.70% | 44.10% | 23.70%       | 9.84%                   | 3.08%     | 16.10%               |
| Specimen_001_A42_020.fcs | AG42      | Acute flare | 47.20% | 98.30%      | 90.40% | 98.40% | 41.20% | 19.20%       | 3.13%                   | 9.66%     | 21.80%               |
| Specimen_001_A43_021.fcs | AG43      | Acute flare | 12.40% | 96.10%      | 89.20% | 96.00% | 40.00% | 29.50%       | 3.25%                   | 8.28%     | 13.10%               |
| Specimen_001_A44_084.fcs | AG44      | Acute flare | 24.60% | 94.40%      | 80.10% | 95.90% | 47.20% | 22.60%       | 12.90%                  | 5.81%     | 15.80%               |
| Specimen_001_A49_087.fcs | AG49      | Acute flare | 10.50% | 97.70%      | 93.60% | 94.00% | 25.40% | 16.80%       | 6.69%                   | 20.40%    | 17.40%               |
| Specimen_001_A50_088.fcs | AG50      | Acute flare | 11.80% | 96.80%      | 93.10% | 94.50% | 35.70% | 31.20%       | 4.24%                   | 17.80%    | 15.70%               |
| Specimen_001_A53_090.fcs | AG53      | Acute flare | 9.60%  | 94.80%      | 94.50% | 93.00% | 45.80% | 36.30%       | 3.29%                   | 16.80%    | 17.40%               |
| Specimen_001_A54_091.fcs | AG54      | Acute flare | 19.00% | 96.90%      | 84.60% | 94.80% | 46.80% | 28.80%       | 7.65%                   | 10.70%    | 9.18%                |
| Specimen_001_A55_092.fcs | AG55      | Acute flare | 13.70% | 96.30%      | 80.70% | 94.00% | 39.60% | 34.90%       | 5.40%                   | 6.32%     | 14.40%               |
| Specimen_001_A56_093.fcs | AG56      | Acute flare | 16.60% | 96.80%      | 84.60% | 96.30% | 29.80% | 39.50%       | 6.24%                   | 17.40%    | 5.73%                |
| Specimen_001_A58_095.fcs | AG58      | Acute flare | 46.60% | 96.20%      | 80.90% | 95.00% | 25.80% | 18.20%       | 9.93%                   | 6.27%     | 14.80%               |
| Specimen_001_A59_096.fcs | AG59      | Acute flare | 50.60% | 95.70%      | 82.90% | 95.30% | 41.10% | 11.10%       | 9.23%                   | 17.70%    | 11.10%               |
| Specimen_001_G1_027.fcs  | RG1       | Remission   | 15.50% | 97.90%      | 94.70% | 94.20% | 13.00% | 17.30%       | 3.85%                   | 27.20%    | 24.70%               |
| Specimen_001_G2_028.fcs  | RG2       | Remission   | 26.00% | 97.10%      | 72.80% | 94.90% | 14.60% | 14.40%       | 3.68%                   | 14.70%    | 20.30%               |
| Specimen_001_G3_029.fcs  | RG3       | Remission   | 15.70% | 98.20%      | 97.30% | 96.20% | 25.20% | 30.30%       | 5.83%                   | 24.10%    | 8.45%                |
| Specimen_001_G4_026.fcs  | RG4       | Remission   | 28.90% | 96.20%      | 98.20% | 96.30% | 17.40% | 22.80%       | 4.43%                   | 24.30%    | 21.30%               |
| Specimen_001_G5_031.fcs  | RG5       | Remission   | 22.30% | 97.50%      | 89.20% | 93.80% | 20.70% | 37.90%       | 10.20%                  | 12.90%    | 28.60%               |
| Specimen_001_G6_030.fcs  | RG6       | Remission   | 30.10% | 97.30%      | 93.40% | 98.70% | 38.60% | 38.60%       | 2.90%                   | 10.80%    | 24.70%               |
| Specimen_001_G7_032.fcs  | RG7       | Remission   | 31.70% | 98.10%      | 85.80% | 98.60% | 24.90% | 45.30%       | 5.01%                   | 13.90%    | 8.33%                |
| Specimen_001_G9_033.fcs  | RG9       | Remission   | 31.90% | 97.10%      | 77.40% | 97.50% | 32.90% | 32.80%       | 5.87%                   | 8.91%     | 15.50%               |
| Specimen_001_G10_045.fcs | RG10      | Remission   | 23.70% | 97.10%      | 89.90% | 91.00% | 41.10% | 43.90%       | 2.31%                   | 8.70%     | 7.50%                |
| Specimen_001_G11_050.fcs | RG11      | Remission   | 11.40% | 96.30%      | 96.20% | 96.20% | 23.30% | 9.69%        | 4.48%                   | 18.20%    | 8.73%                |
| Specimen_001_G12_034.fcs | RG12      | Remission   | 23.30% | 95.90%      | 80.80% | 95.80% | 25.10% | 10.30%       | 8.04%                   | 26.00%    | 13.50%               |
| Specimen_001_G13_035.fcs | RG13      | Remission   | 26.10% | 96.20%      | 78.10% | 96.20% | 40.30% | 37.70%       | 5.22%                   | 3.82%     | 13.90%               |
| Specimen_001_G14_058.fcs | RG14      | Remission   | 8.08%  | 93.60%      | 81.80% | 90.20% | 36.70% | 40.10%       | 6.45%                   | 12.80%    | 18.90%               |
| Specimen_001_G15_059.fcs | RG15      | Remission   | 11.10% | 93.80%      | 88.80% | 97.90% | 25.20% | 31.70%       | 4.66%                   | 11.40%    | 8.34%                |
| Specimen_001_G19_051.fcs | RG19      | Remission   | 8.50%  | 95.80%      | 96.10% | 95.60% | 40.10% | 39.80%       | 3.89%                   | 33.60%    | 11.50%               |
| Specimen_001_G20_060.fcs | RG20      | Remission   | 23.60% | 97.40%      | 79.40% | 92.70% | 31.90% | 18.80%       | 2.75%                   | 28.00%    | 8.11%                |
| Specimen_001_G21_061.fcs | RG21      | Remission   | 40.30% | 93.00%      | 80.30% | 94.40% | 36.00% | 10.10%       | 7.75%                   | 9.33%     | 7.91%                |
| Specimen_001_G22_062.fcs | RG22      | Remission   | 21.30% | 95.70%      | 85.20% | 92.40% | 54.40% | 25.60%       | 4.55%                   | 13.10%    | 12.80%               |
| Specimen_001_G23_063.fcs | RG23      | Remission   | 16.00% | 96.10%      | 98.90% | 80.20% | 23.20% | 50.00%       | 5.64%                   | 29.10%    | 9.78%                |
| Specimen_001_R14_022.fcs | R14       | Remission   | 23.70% | 96.80%      | 96.20% | 96.60% | 18.10% | 36.60%       | 3.81%                   | 25.10%    | 12.50%               |
| Specimen_001_R16_054.fcs | RG16      | Remission   | 56.10% | 96.70%      | 98.50% | 97.90% | 29.40% | 27.70%       | 6.39%                   | 13.10%    | 6.74%                |
| Specimen_001_R42_024.fcs | RG42      | Remission   | 33.90% | 98.30%      | 86.60% | 98.00% | 47.40% | 39.10%       | 3.06%                   | 6.15%     | 11.70%               |
| Specimen_001_R43_025.fcs | RG43      | Remission   | 32.50% | 98.20%      | 98.00% | 94.40% | 31.00% | 16.20%       | 0.17%                   | 43.60%    | 2.51%                |

Supplemental Table 2 Percentages of Treg cells between gout flare and remission by flow cytometry

| Sample ID | Group       | T cells (% of lymphocyte) | CD4 <sup>+</sup> T cells (% of T cells) | Th1 (% of Th cells) | Th2 (% of Th cells) | Th17 (% of Th cells) | Treg cells (% of T cells) |
|-----------|-------------|---------------------------|-----------------------------------------|---------------------|---------------------|----------------------|---------------------------|
| AG1       | Acute flare | 54.6                      | 51.7                                    | 8.64                | 27.7                | 1.01                 | 3.23                      |
| A2        | Acute flare | 65.9                      | 51                                      | 28                  | 9.08                | 1.26                 | 3.39                      |
| AG4       | Acute flare | 73.3                      | 79.9                                    | 38.3                | 13.4                | 1.3                  | 2.2                       |
| AG7       | Acute flare | 76.6                      | 30.5                                    | 16.5                | 11.7                | 1.51                 | 1.1                       |
| A8        | Acute flare | 65.3                      | 54.6                                    | 26.2                | 10.9                | 2.24                 | 2.11                      |
| A9        | Acute flare | 54.5                      | 65.9                                    | 13.6                | 21.2                | 2.53                 | 2.84                      |
| A10       | Acute flare | 72.2                      | 38.7                                    | 30.9                | 13.6                | 0.86                 | 1.62                      |
| A13       | Acute flare | 61.7                      | 65.8                                    | 27.5                | 9.35                | 2.6                  | 2.62                      |
| AG12      | Acute flare | 75.5                      | 43.6                                    | 41.3                | 8.74                | 0.6                  | 2.52                      |
| AG11      | Acute flare | 58.3                      | 62.7                                    | 31.6                | 21.4                | 2.28                 | 3.71                      |
| AG14      | Acute flare | 61.8                      | 62.4                                    | 26.3                | 20                  | 2.42                 | 5.66                      |
| AG16      | Acute flare | 83.4                      | 55.7                                    | 30.5                | 5.7                 | 0.62                 | 2.82                      |
| AG21      | Acute flare | 71.6                      | 64.6                                    | 20.7                | 16.6                | 0.9                  | 4.79                      |
| AG23      | Acute flare | 74.8                      | 47.4                                    | 24.5                | 13.2                | 1.17                 | 3.98                      |
| AG24      | Acute flare | 45.2                      | 58.5                                    | 13.8                | 6.47                | 0.54                 | 9.32                      |
| AG33      | Acute flare | 59.4                      | 57.5                                    | 15.1                | 11.9                | 0.76                 | 5.74                      |
| AG36      | Acute flare | 48.8                      | 54.7                                    | 23.7                | 15.4                | 1.75                 | 4.77                      |
| AG40      | Acute flare | 65.8                      | 52.8                                    | 11.4                | 19.9                | 0.62                 | 3.7                       |
| AG41      | Acute flare | 72.2                      | 59.4                                    | 55.5                | 9.28                | 1.14                 | 3.76                      |
| AG42      | Acute flare | 64.2                      | 58.4                                    | 7.65                | 24.2                | 1.28                 | 5.63                      |
| AG43      | Acute flare | 74.7                      | 48.3                                    | 17.6                | 18.5                | 1.39                 | 2.9                       |
| AG44      | Acute flare | 75.5                      | 51.6                                    | 20.2                | 16.4                | 1.23                 | 3.04                      |
| AG49      | Acute flare | 74.9                      | 59.6                                    | 19.1                | 25.7                | 1                    | 3.73                      |
| AG50      | Acute flare | 68                        | 52.1                                    | 8.89                | 42.4                | 0.52                 | 4.28                      |
| A52       | Acute flare | 78.7                      | 79.4                                    | 15.9                | 17.7                | 1.39                 | 7.55                      |
| AG53      | Acute flare | 47.7                      | 55.9                                    | 21.4                | 23.4                | 7.18                 | 3                         |
| AG59      | Acute flare | 57.8                      | 57.5                                    | 9.57                | 18.5                | 12.8                 | 4.1                       |
| A1        | Acute flare | 75.7                      | 58.4                                    | 9.24                | 28.6                | 18.6                 | 2.48                      |
| AG3       | Acute flare | 69.4                      | 64.2                                    | 29.5                | 11                  | 4.51                 | 3.68                      |
| A3        | Acute flare | 64.3                      | 57.4                                    | 17.5                | 15                  | 4.67                 | 4.05                      |
| AG5       | Acute flare | 58.1                      | 64.4                                    | 17.6                | 10.6                | 1.9                  | 4.16                      |
| AG6       | Acute flare | 86.9                      | 71                                      | 18.2                | 12.5                | 3.04                 | 3.02                      |
| AG8       | Acute flare | 61.5                      | 86.3                                    | 12.6                | 26                  | 1.91                 | 3.63                      |
| AG9       | Acute flare | 72.8                      | 66.6                                    | 10.1                | 16.1                | 8.95                 | 4.54                      |
| AG10      | Acute flare | 38.2                      | 34.3                                    | 6.56                | 17.2                | 2.81                 | 1.57                      |
| AG13      | Acute flare | 72.5                      | 60                                      | 29                  | 8.32                | 1.74                 | 3.98                      |
| AG15      | Acute flare | 72.5                      | 61.8                                    | 12.6                | 21.5                | 2.59                 | 3.62                      |
| AG19      | Acute flare | 70.5                      | 47.7                                    | 3.87                | 19.8                | 4.76                 | 3.86                      |
| AG17      | Acute flare | 82.7                      | 64.4                                    | 8.79                | 13                  | 0.55                 | 3.66                      |
| AG20      | Acute flare | 50.4                      | 76.7                                    | 16.7                | 15.5                | 2.93                 | 3.1                       |
| AG18      | Acute flare | 69.5                      | 53                                      | 21.3                | 16.8                | 1.2                  | 2.08                      |
| P2        | Remission   | 79.7                      | 57.5                                    | 22.3                | 9.08                | 1.53                 | 3.12                      |
| G7        | Remission   | 71.9                      | 65.5                                    | 14.5                | 22                  | 1.54                 | 2.91                      |
| G8        | Remission   | 68.7                      | 51.9                                    | 22.7                | 11.3                | 1.15                 | 2.62                      |
| G9        | Remission   | 60.7                      | 67.8                                    | 13.6                | 20.8                | 2.16                 | 3.57                      |
| G10       | Remission   | 66.4                      | 72.6                                    | 22.3                | 8.6                 | 2.78                 | 4.8                       |
| G13       | Remission   | 77.2                      | 38.7                                    | 20.8                | 19.9                | 2.26                 | 1.93                      |
| RG42      | Remission   | 70.9                      | 57.5                                    | 11.3                | 10.4                | 1.24                 | 5.08                      |
| RG43      | Remission   | 77.7                      | 51.2                                    | 10                  | 26.2                | 1.43                 | 3.81                      |
| G52       | Remission   | 75.7                      | 80.1                                    | 10.7                | 12.3                | 1.53                 | 7.37                      |
| G22       | Remission   | 67.1                      | 53.9                                    | 27.4                | 9.44                | 1.17                 | 3.78                      |
| G23       | Remission   | 44.1                      | 57.2                                    | 8.69                | 13.9                | 3.11                 | 6.41                      |
| R28       | Remission   | 90.7                      | 80.2                                    | 18                  | 8.16                | 1.21                 | 5.07                      |
| R29       | Remission   | 59.4                      | 66                                      | 39.7                | 17.7                | 4.57                 | 2.88                      |
| R30       | Remission   | 45.6                      | 53.2                                    | 4.24                | 8.77                | 1.57                 | 2.79                      |
| R31       | Remission   | 22.7                      | 85.3                                    | 14.4                | 18.7                | 1.66                 | 9.72                      |
| RG9       | Remission   | 58.8                      | 68.9                                    | 17.4                | 25.3                | 2.22                 | 5                         |
| RG11      | Remission   | 83.8                      | 38.3                                    | 27.6                | 18.8                | 1.23                 | 2.5                       |
| RG14      | Remission   | 63.8                      | 68.8                                    | 10.8                | 17.5                | 1.31                 | 6.84                      |
| RG39      | Remission   | 55.8                      | 79.2                                    | 26.2                | 17.6                | 0.99                 | 6.17                      |
| RG1       | Remission   | 78.1                      | 66.3                                    | 35.2                | 19                  | 1.75                 | 10.1                      |
| RG2       | Remission   | 73.6                      | 70.9                                    | 30.3                | 19.6                | 1.32                 | 11.9                      |
| RG6       | Remission   | 67.9                      | 57.1                                    | 15.2                | 24.4                | 1.03                 | 5.41                      |
| RG13      | Remission   | 66.8                      | 40.6                                    | 14.8                | 29.6                | 0.81                 | 2.67                      |
| RG56      | Remission   | 60.8                      | 75.8                                    | 16.2                | 18.2                | 1.79                 | 6                         |
| RG32      | Remission   | 54.4                      | 71.4                                    | 11.2                | 13                  | 6.95                 | 4.21                      |
| RG33      | Remission   | 86.1                      | 53.6                                    | 22.4                | 14.2                | 3.83                 | 5.67                      |
| RG34      | Remission   | 73                        | 65.8                                    | 19.8                | 22.3                | 2.38                 | 4.94                      |
| RG35      | Remission   | 78.9                      | 70.9                                    | 16.9                | 12.1                | 2.37                 | 3.65                      |
| RG36      | Remission   | 77.6                      | 65.6                                    | 8.33                | 13.6                | 1.76                 | 5.65                      |
| RG37      | Remission   | 63.9                      | 49.4                                    | 9.18                | 22.3                | 5.42                 | 3.44                      |
| RG38      | Remission   | 82.3                      | 76.4                                    | 6.64                | 12.6                | 0.25                 | 2.69                      |
| RG49      | Remission   | 65.5                      | 59                                      | 16                  | 15.9                | 5.53                 | 4.42                      |
| RG40      | Remission   | 44.8                      | 53.8                                    | 11.3                | 23.8                | 5.21                 | 4.7                       |
| RG41      | Remission   | 82.1                      | 92.4                                    | 4.98                | 11.9                | 2.05                 | 4.4                       |
| RG44      | Remission   | 64.5                      | 63.7                                    | 18.2                | 9.04                | 0.98                 | 5.77                      |

Supplemental Table 3 A gene list associated with cytokine, inflammatory response and arachidonic acid pathway

| Cytokines | Inflammatory | Arachidonic acid pathway |
|-----------|--------------|--------------------------|
| IL2       | ABCA1        | AKR1C3                   |
| IL7       | AB1          | ALOX12                   |
| CSF3      | ACVRI1B      | ALOX12B                  |
| CCCL10    | ACVRI2A      | ALOX15                   |
| CCL2      | ADGRE1       | ALOX15B                  |
| CCL3      | ADM          | ALOX5                    |
| TNF       | ADORA2B      | CBR1                     |
| TFTN1     | ADRM1        | CBR3                     |
| IL6       | AHR          | CYP2B6                   |
| CCL7      | APLR         | CYP2C18                  |
| IL1RN     | AP3          | CYP2C19                  |
| CSF1      | AT2A2        | CYP2C9                   |
| IFNG      | AT2B1        | CYP2C9                   |
| IL2RA     | AT2C1        | CYP2E1                   |
| IL10      | AXL          | CYP2J2                   |
| IL18      | BDKRB1       | CYP2U1                   |
| HGF       | BEST1        | CYP4A11                  |
| CXCL9     | BST2         | CYP4A22                  |
| CCL27     | BTG2         | CYP4F2                   |
| TGFB1     | C3AR1        | CYP4F3                   |
| IL1B      | CSAR1        | EPHX2                    |
| LTA       | CALCR        | GGT1                     |
| CSF2      | CCL17        | GGT6                     |
| LTB       | CCL2         | GGT6                     |
| TNFSF13   | CCL20        | GGT7                     |
| IL4       | CCL22        | GPX1                     |
| CCL12     | CCL24        | GPX2                     |
| CXCL8     | CCL5         | GPX3                     |
| CXCL11    | CCL7         | GPX4                     |
| CCL4      | CCR7         | GPX5                     |
| CXCL2     | CCR2         | GPX6                     |
| CXCL3     | CD14         | GPX7                     |
| CCL3L1    | CD40         | HPGD5                    |
| CCL8      | CD48         | JMJD1-PLA2G4B            |
| CXCL16    | CD55         | LTA4H                    |
| IFNA1     | CD68         | LTC4S                    |
| CCL5      | CD70         | PLA2G10                  |
| CCL11     | CD82         | PLA2G12A                 |
| IFNA2     | CDKN1A       | PLA2G12B                 |
| CCL20     | CHST2        | PLA2G1B                  |
| CCL4E2    | CLEC10A      | PLA2G2A                  |
| OSM       | CMKLR1       | PLA2G2C                  |
| TNFSF14   | CSF1         | PLA2G2D                  |
| SA100A12  | CSF3         | PLA2G2E                  |
| FGF19     | CSF3R        | PLA2G2F                  |
| CXCL5     | CXCL10       | PLA2G3                   |
| CCL19     | CXCL11       | PLA2G4A                  |
| IL18R1    | CXCL6        | PLA2G4B                  |
| TGFA      | CXCL8        | PLA2G4E                  |
| IFNH1     | CXCL9        | PLA2G5                   |
| IL8       | CXCR6        | PTGS5                    |
| IL17C     | CTBB         | PTGS6                    |
| TNFSF10   | DCBLD2       | PTGS62                   |
| FGF7      | EB3          | PTGS                     |
| XCL1      | EDN1         | PTGS1                    |
| FGF13     | EF2AK2       | PTGS2                    |
| LIF       | EM2          | PTGS2                    |
| TGFB3     | EREG         | TBXA51                   |
| INHBE     | FS           |                          |
| CERS1     | FFAR2        |                          |
| TXLNA     | FRP1         |                          |
| IFNW1     | FDX          |                          |
| IL22      | GABBR1       |                          |
| XCL2      | GCH1         |                          |
| CCL20     | GNAS1        |                          |
| CCL16     | GNAS3        |                          |
| CDM1G     | GPIBA        |                          |
| IL20      | GPC3         |                          |
| FASLG     | GPR132       |                          |
| TPO       | GPR183       |                          |
| SCYL3     | HAS2         |                          |
| PCAF1     | HREGF        |                          |
| TNFSF8    | HIF1A        |                          |
| GFY15     | HRH1         |                          |
| IL1A      | HRH1         |                          |
| VEGFA     | ICAM1        |                          |
| GDF7      | ICAM4        |                          |
| BMPE      | ICSLG        |                          |
| PDGFA     | IFTM1        |                          |
| IL21      | IFNAR1       |                          |
| ABCD1     | IFNGR2       |                          |
| ABCD2     | IL10         |                          |
| PDGFB     | IL10RA       |                          |
| TNFSF4    | IL12B        |                          |
| FAM19A1   | IL15         |                          |
| HREGF     | IL18RA       |                          |
| PDGFD     | IL15         |                          |
| IL12RB2   | IL18R1       |                          |
| GM1       | IL18RAP      |                          |
| VEGFB     | IL1A         |                          |
| MIP2B     | IL1B         |                          |
| IL27      | IL1R1        |                          |
| PF4       | IL2RB        |                          |
| BMPEB     | IL4R         |                          |
| TNFSF12   | IL6          |                          |
| IL15      | IL7R         |                          |
| SCYL2     | INHBA        |                          |
| SCYL1     | IRAK2        |                          |
| TSFP      | IRF1         |                          |
| GDF11     | IRF7         |                          |
| SEPIB     | ITGAE        |                          |
| INHBA     | ITGB3        |                          |
| PPBP      | ITGB8        |                          |
| FGF11     | KCNA3        |                          |
| IFNG-AS1  | KCNJ2        |                          |
| FGF22     | KCNMB2       |                          |
| VEGFC     | KIF1B        |                          |
| CCL16     | KLFB         |                          |
| TNFSF11   | LAMP3        |                          |
| IL12A     | LCK          |                          |
| EB3       | LC2P         |                          |
| AMH       | LDLR         |                          |
| IL36      | LIF          |                          |
| IL32      | LPAR1        |                          |
| PDGFC     | LTA          |                          |
| FGF23     | LYVE         |                          |
| IGF1      | LYN          |                          |
| IL1F1     | MARGO        |                          |
| CCL28     | MEFV         |                          |
| CCL21     | MEP1A        |                          |
| TNFSF9    | MET          |                          |
| BMPE      | MMP14        |                          |
| IL24      | MIR1         |                          |
| GDF10     | MXD1         |                          |
| CXCL5     | MTC          |                          |
| GDF9      | NAMPT        |                          |
| IL23A     | NIP          |                          |
| IL16      | NKKB1        |                          |
| CD70      | NKKB1A       |                          |
| IL5       | NLRP3        |                          |
| FGF9      | NMI          |                          |
| IFNL1     | NMUR1        |                          |
| TSO1      | NO2          |                          |
| FGF2      | NPFFR2       |                          |
| IL23R     | OLR1         |                          |
| IL16      | OPRK1        |                          |
| SP1       | OSM          |                          |
| IL12RB1   | OSMR         |                          |
| BMPE      | P2RX4        |                          |
| IL13      | P2RX7        |                          |
| TPAR1     | P2RY2        |                          |
| TGFB2     | PCHN7        |                          |
| FAM19A2   | PDE4B        |                          |
| AGF3      | PDPR         |                          |
| EDA       | PKRIS        |                          |
| MF        | PLAUR        |                          |
| TNFSF13B  | PROK2        |                          |
| BMPE      | PSEN1        |                          |
| FGF18     | PTAFR        |                          |
| CCL23     | PTGER2       |                          |
|           | PTGER4       |                          |
|           | PTGR         |                          |
|           | PTPRE        |                          |
|           | PVR          |                          |
|           | RAF1         |                          |
|           | RASGRP1      |                          |
|           | RELA         |                          |
|           | RO51         |                          |
|           | RO516        |                          |
|           | RHOQ         |                          |
|           | RPK2         |                          |
|           | RNF44B       |                          |
|           | RO51         |                          |
|           | RTK4         |                          |
|           | SCARF1       |                          |
|           | SCN1B        |                          |
|           | SELE         |                          |
|           | SELENOS      |                          |
|           | SELL         |                          |
|           | SEMA4D       |                          |
|           | SERPINE1     |                          |
|           | SERP2        |                          |
|           | SLAMF1       |                          |
|           | SLC11A2      |                          |
|           | SLC1A2       |                          |
|           | SLC39A2      |                          |
|           | SLC31A1      |                          |
|           | SLC31A2      |                          |
|           | SLC4A4       |                          |
|           | SLC7A1       |                          |
|           | SLC7A2       |                          |
|           | SPHK1        |                          |
|           | SRI          |                          |
|           | STAB1        |                          |
|           | TACR1        |                          |
|           | TACR3        |                          |
|           | TAPBP        |                          |
|           | TIMP1        |                          |
|           | TLR1         |                          |
|           | TLR2         |                          |
|           | TLR3         |                          |
|           | TNFAIP6      |                          |
|           | TNFRSF18     |                          |
|           | TNFRSF9      |                          |
|           | TNFRSF10     |                          |
|           | TNFRSF16     |                          |
|           | TNFRSF17     |                          |
|           | TNFRSF9      |                          |
|           | TPSD         |                          |
|           | VIP          |                          |



Supplemental Table 5 Baseline characteristics and laboratory findings of gout flare and gout remission in scRNA-seq study

| Patient number                                                                                                                       | P1                                |           | P2          |           | P3                                                       |           |
|--------------------------------------------------------------------------------------------------------------------------------------|-----------------------------------|-----------|-------------|-----------|----------------------------------------------------------|-----------|
| Age, years                                                                                                                           | 53                                |           | 53          |           | 23                                                       |           |
| Gender                                                                                                                               | male                              |           | male        |           | male                                                     |           |
| Height, cm                                                                                                                           | 177                               |           | 178         |           | 175                                                      |           |
| Weight, kg                                                                                                                           | 69.5                              |           | 80.0        |           | 85.0                                                     |           |
| BMI,kg/m <sup>2</sup>                                                                                                                | 22.18                             |           | 25.25       |           | 27.76                                                    |           |
| Medical illness                                                                                                                      | hypertension,nephrolithiasis,gout |           |             |           | hypertension,nephrolithiasis,fatty liver,renal cyst,gout |           |
| Disease stage                                                                                                                        | acute flare                       | remission | acute flare | remission | acute flare                                              | remission |
| Dual source CT, tophi                                                                                                                | positive                          |           | positive    |           | positive                                                 |           |
| Duration of gout                                                                                                                     | 20                                |           | 20          |           | 2                                                        |           |
| Use of urate-lowering therapy at the time of their entry flare                                                                       | yes                               |           | yes         |           | yes                                                      |           |
| Use of anti-inflammatory agents, including colchicine and anti-IL1 therapy, at the time of their flare (besides steroids and NSAIDs) | No                                |           | No          |           | No                                                       |           |
| Red blood cell count, X10 <sup>12</sup> /L, (4.30-5.80)                                                                              | 4.03                              | 4.85      | 4.40        | 4.27      | 4.82                                                     | 4.97      |
| Haemoglobin, g/l, (130-175)                                                                                                          | 128.00                            | 143.00    | 144.00      | 138.00    | 140.00                                                   | 147.00    |
| White blood cell count, X10 <sup>9</sup> /L, (3.50-9.50)                                                                             | 9.21                              | 7.80      | 10.90       | 6.68      | 7.09                                                     | 6.91      |
| Platelet count, X10 <sup>9</sup> /L, (125-350)                                                                                       | 338.00                            | 329.00    | 179.00      | 195.00    | 310.00                                                   | 221.00    |
| Neutrophil percentage, %, (40-75)                                                                                                    | 63.90                             | 57.10     | 66.30       | 53.90     | 64.10                                                    | 62.40     |
| Lymphocyte percentage, %, (20-50)                                                                                                    | 23.00                             | 31.20     | 22.20       | 34.40     | 28.10                                                    | 28.90     |
| Monocyte percentage, %, (3-10)                                                                                                       | 8.70                              | 6.70      | 9.70        | 8.70      | 5.50                                                     | 6.00      |
| Eosinophils percentage, %, (0.4-8)                                                                                                   | 3.50                              | 4.50      | 1.50        | 2.40      | 1.90                                                     | 2.40      |
| Basophils percentage, %, (0-1)                                                                                                       | 0.90                              | 0.50      | 0.30        | 0.60      | 0.40                                                     | 0.30      |
| C-reactive protein, mg/L, (<8.2)                                                                                                     | 6.97                              | 2.43      | 12.40       | 2.59      | 38.82                                                    | 3.95      |
| Alanine aminotransferase, IU/L, (9-50)                                                                                               | 16.70                             | 14.50     | 39.00       | 24.50     | 19.90                                                    | 6.80      |
| Aspartate aminotransferase, IU/L, (15-40)                                                                                            | 18.20                             | 14.10     | 52.30       | 18.20     | 21.20                                                    | 25.10     |
| Total protein, g/L, (65-85)                                                                                                          | 76.70                             | 72.50     | 78.60       | 71.50     | 81.30                                                    | 76.60     |
| Albumin, g/L(40-55)                                                                                                                  | 43.30                             | 41.10     | 45.80       | 43.20     | 48.00                                                    | 49.50     |
| Fasting Blood Glucose, mmol/L, (3.9-6.1)                                                                                             | 4.50                              | 4.61      | 5.00        | 5.30      | 4.70                                                     | 4.80      |
| Urea, mmol/L, (2.76-8.07)                                                                                                            | 6.25                              | 5.90      | 8.11        | 5.40      | 4.19                                                     | 3.54      |
| Estimated Glomerular Filtration Rate, ml/min/L, (>90)                                                                                | 87.94                             | 90.23     | 145.95      | 91.41     | 115.68                                                   | 124.45    |
| Serum Creatine, umol/L, (57-97)                                                                                                      | 87.00                             | 84.00     | 81.20       | 83.00     | 82.00                                                    | 72.00     |
| Uric acid, umol/L, (208-428)                                                                                                         | 486.00                            | 512.00    | 335.00      | 522.00    | 533.00                                                   | 646.00    |
| Total Cholesterol, mmol/L, (<5.2)                                                                                                    | 2.95                              | 3.76      | 2.68        | 3.33      | 4.66                                                     | 4.80      |
| Triglyceride, mmol/L, (<1.7)                                                                                                         | 1.93                              | 2.59      | 1.97        | 2.92      | 1.19                                                     | 1.30      |
| High-Density Lipoprotein, mmol/L, (1.04-1.55)                                                                                        | 1.16                              | 1.10      | 1.20        | 1.70      | 0.69                                                     | 1.01      |
| Low-Density Lipoprotein, mmol/L, (<3.34)                                                                                             | 0.93                              | 2.09      | 0.53        | 1.20      | 3.28                                                     | 3.15      |

Supplemental Table 8 Baseline characteristics and laboratory findings of good form and good retention in an independent validation cohort

| Sample ID | Group       | Gender | Age, years | Height, cm | Weight, kg | DM/leg <sup>2</sup> | Red blood cell count, 10 <sup>12</sup> /L | Hemoglobin, g/l | White blood cell count, 10 <sup>9</sup> /L | Platelet count, 10 <sup>9</sup> /L | Neutrophil percentage, % | Lymphocyte percentage, % | Monocyte percentage, % | Eosinophil percentage, % | Basophil percentage, % | Ureae, mmol/L | Insulin, mU/L | Serum Creatinine, $\mu$ mol/L | HbA1c, mmol/L |
|-----------|-------------|--------|------------|------------|------------|---------------------|-------------------------------------------|-----------------|--------------------------------------------|------------------------------------|--------------------------|--------------------------|------------------------|--------------------------|------------------------|---------------|---------------|-------------------------------|---------------|
| AG1       | Acute flare | male   | 72         | 168        | 65         | 23.83               | 3.14                                      | 96              | 12.13                                      | 218                                | 86.2                     | 7.1                      | 6.4                    | 0.2                      | 0.1                    | 16.7          | 15.2          | 219                           | 574           |
| A2        | Acute flare | male   | 43         | 175        | 83         | 26.37               | 4.89                                      | 109             | 12.77                                      | 200                                | 76.9                     | 12.4                     | 6.4                    | 2.2                      | 0.1                    | 79.5          | 3.41          | 79.6                          | 565.1         |
| AG4       | Acute flare | male   | 61         | 172        | 73         | 24.65               | 4.86                                      | 109             | 5.99                                       | 166                                | 59.9                     | 33.6                     | 5.7                    | 2.8                      | 1                      | 40.3          | 5.8           | 80                            | 564           |
| AG7       | Acute flare | male   | 51         | 176        | 83         | 27.10               | 5.55                                      | 178             | 5.52                                       | 171                                | 57.1                     | 32.5                     | 7.8                    | 2.2                      | 0.4                    | 24.4          | 5.1           | 102                           | 397           |
| A8        | Acute flare | male   | 32         | 175        | 75         | 24.49               | 2.22                                      | 164             | 4.65                                       | 265                                | 69.9                     | 26.9                     | 6.9                    | 3                        | 0.2                    | 34            | 4.9           | 74                            | 620           |
| A9        | Acute flare | male   | 34         | 173        | 76         | 25.39               | 2.62                                      | 173             | 11.15                                      | 239                                | 74.1                     | 20.4                     | 5                      | 0.3                      | 0.2                    | 60.7          | 7.88          | 101.9                         | 437.4         |
| A10       | Acute flare | male   | 26         | 175        | 75         | 24.49               | 5.17                                      | 163             | 13.32                                      | 200                                | 78.8                     | 15                       | 5.6                    | 0.5                      | 0.1                    | 38.2          | 4.73          | 92.9                          | 565.3         |
| A13       | Acute flare | male   | 46         | 175        | 80         | 26.12               | 5.61                                      | 164             | 6.12                                       | 203                                | 68.7                     | 17.5                     | 6.2                    | 0.2                      | 0.4                    | 14.3          | 5.3           | 91                            | 543           |
| AG12      | Acute flare | male   | 55         | 170        | 65         | 22.49               | 5.07                                      | 154             | 6.58                                       | 200                                | 72.5                     | 30.2                     | 6.43                   | 0.3                      | 0.4                    | 18.2          | 4.6           | 116                           | 421           |
| AG11      | Acute flare | male   | 34         | 173        | 80         | 26.87               | 5.41                                      | 165             | 16.38                                      | 201                                | 80.1                     | 12.5                     | 5.1                    | 2.1                      | 0.2                    | 27.4          | 4.43          | 82.7                          | 620.3         |
| AG14      | Acute flare | male   | 49         | 173        | 81         | 27.06               | 5.04                                      | 148             | 10.26                                      | 244                                | 62.9                     | 29.9                     | 6.2                    | 0.9                      | 0.1                    | 49            | 4.10          | 85.6                          | 456.6         |
| AG16      | Acute flare | male   | 53         | 175        | 80         | 28.88               | 5.17                                      | 166             | 6.21                                       | 212                                | 62.1                     | 25.9                     | 6.9                    | 1.9                      | 0.2                    | 24.5          | 4.84          | 68.7                          | 491           |
| AG21      | Acute flare | male   | 34         | 182        | 90         | 27.17               | 5.51                                      | 157             | 6.62                                       | 208                                | 80.4                     | 29.2                     | 8.2                    | 1.8                      | 0.4                    | 31            | 4.87          | 79.5                          | 592.3         |
| AG23      | Acute flare | male   | 58         | 176        | 65         | 26.96               | 5.93                                      | 155             | 9.84                                       | 235                                | 78.8                     | 12.4                     | 7.6                    | 1                        | 0.2                    | 19.4          | 6.91          | 125.7                         | 545.1         |
| AG24      | Acute flare | male   | 59         | 179        | 75         | 23.87               | 5.74                                      | 139             | 9.22                                       | 196                                | 63.1                     | 27.6                     | 6.2                    | 0.5                      | 0.4                    | 9.8           | 4.72          | 69.6                          | 452.5         |
| AG33      | Acute flare | male   | 43         | 170        | 65         | 22.48               | 5.17                                      | 155             | 10.35                                      | 201                                | 76                       | 19                       | 4                      | 0.8                      | 0.2                    | 89.5          | 2.42          | 54.4                          | 477.6         |
| AG35      | Acute flare | male   | 33         | 180        | 81         | 25.00               | 5.27                                      | 168             | 7.25                                       | 219                                | 69.6                     | 22.7                     | 6.2                    | 0.3                      | 0.2                    | 27.7          | 4.14          | 82.9                          | 455.6         |
| AG40      | Acute flare | male   | 35         | 172        | 83         | 28.86               | 5.56                                      | 164             | 10.36                                      | 210                                | 65                       | 26.8                     | 7.7                    | 0.4                      | 0.1                    | 33.2          | 5             | 89                            | 283           |
| AG41      | Acute flare | male   | 54         | 164        | 74.5       | 27.70               | 5.18                                      | 155             | 7.54                                       | 197                                | 74.3                     | 16.6                     | 6.4                    | 0.5                      | 0.2                    | 47.1          | 3.84          | 79.3                          | 177.2         |
| AG42      | Acute flare | male   | 40         | 179        | 86         | 26.84               | 4.88                                      | 151             | 4.84                                       | 338                                | 54.6                     | 37.2                     | 4.7                    | 2.6                      | 0.9                    | 27.1          | 4.82          | 74.8                          | 416.4         |
| AG43      | Acute flare | male   | 56         | 165        | 65.5       | 25.16               | 3.8                                       | 100             | 7.88                                       | 236                                | 82.9                     | 13                       | 3.5                    | 0.3                      | 0.3                    | 4             | 9.6           | 193                           | 609           |
| AG44      | Acute flare | male   | 33         | 175        | 72         | 23.51               | 5.24                                      | 153             | 7.88                                       | 200                                | 65.4                     | 33.6                     | 5.6                    | 2                        | 0.4                    | 32.3          | 4.55          | 77.4                          | 525.9         |
| AG49      | Acute flare | male   | 44         | 172        | 75         | 23.35               | 5.25                                      | 158             | 9.88                                       | 229                                | 69.2                     | 23.1                     | 6.3                    | 1.9                      | 0.5                    | 35.8          | 4.33          | 111.9                         | 524.7         |
| AG50      | Acute flare | male   | 38         | 175        | 75         | 24.49               | 4.75                                      | 154             | 6.77                                       | 200                                | 71.5                     | 22.6                     | 4.8                    | 0.6                      | 0.3                    | 24.2          | 5.54          | 100.2                         | 474.2         |
| AG2       | Acute flare | male   | 35         | 178        | 78         | 24.82               | 5.02                                      | 158             | 11.43                                      | 200                                | 62.6                     | 27                       | 7.9                    | 1.2                      | 0.3                    | 25.6          | 4.1           | 84                            | 687           |
| AG53      | Acute flare | male   | 42         | 170        | 75         | 25.95               | 4.75                                      | 151             | 5.78                                       | 176                                | 59.9                     | 30.7                     | 7.6                    | 1.3                      | 0.5                    | 89.6          | 5.76          | 82.3                          | 591.9         |
| AG54      | Acute flare | male   | 62         | 186        | 90         | 26.91               | 5.3                                       | 165             | 6.88                                       | 186                                | 69.9                     | 31.7                     | 5.5                    | 1.7                      | 0.2                    | 26.5          | 4.89          | 61.7                          | 568.3         |
| AG55      | Acute flare | male   | 58         | 182        | 90         | 27.17               | 5                                         | 149             | 7.28                                       | 208                                | 75.3                     | 17.8                     | 5.6                    | 1.1                      | 0.2                    | 21.7          | 5.91          | 47.5                          | 606.6         |
| AG56      | Acute flare | male   | 50         | 170        | 80         | 31.14               | 4.5                                       | 143             | 6.13                                       | 214                                | 70.5                     | 24.3                     | 3.7                    | 1.3                      | 0.2                    | 32.1          | 4.33          | 92                            | 528.5         |
| AG58      | Acute flare | male   | 34         | 178        | 85         | 26.83               | 4.85                                      | 156             | 6.37                                       | 219                                | 67.1                     | 23.9                     | 3.9                    | 1.6                      | 0.4                    | 20.3          | 5.91          | 76.4                          | 453.6         |
| AG59      | Acute flare | male   | 40         | 180        | 100        | 30.86               | 5.22                                      | 159             | 10.05                                      | 270                                | 54.9                     | 34.5                     | 6.4                    | 4                        | 0.3                    | 88.2          | 5.5           | 79.7                          | 546           |
| P1        | Acute flare | male   | 53         | 177        | 68.5       | 22.18               | 4.93                                      | 128             | 9.21                                       | 338                                | 63.9                     | 23                       | 6.7                    | 3.5                      | 0.9                    | 16.7          | 6.25          | 67                            | 636           |
| P2        | Acute flare | male   | 53         | 170        | 80         | 25.25               | 4.4                                       | 144             | 10.9                                       | 179                                | 66.2                     | 22.2                     | 9.7                    | 1.5                      | 0.3                    | 36            | 6.11          | 81.2                          | 335           |
| AG3       | Acute flare | male   | 38         | 172        | 84         | 31.77               | 5.08                                      | 155             | 7.28                                       | 233                                | 66.2                     | 37.4                     | 5                      | 1.3                      | 0.1                    | 79            | 3             | 83                            | 549           |
| P3-A      | Acute flare | male   | 23         | 175        | 65         | 27.76               | 4.82                                      | 146             | 7.88                                       | 310                                | 64.1                     | 28.1                     | 6.5                    | 1.9                      | 0.4                    | 19.8          | 4.19          | 82                            | 533           |
| AG5       | Acute flare | male   | 27         | 178        | 88         | 30.83               | 4.94                                      | 155             | 8.07                                       | 275                                | 69.9                     | 25.3                     | 6.4                    | 1.1                      | 0.3                    | 192.8         | 4.24          | 96                            | 798           |
| AG6       | Acute flare | male   | 52         | 170        | 70         | 24.22               | 4.69                                      | 158             | 7.35                                       | 205                                | 47.8                     | 36.4                     | 6.8                    | 0.3                      | 0.7                    | 21.9          | 5.89          | 91                            | 596           |
| AG8       | Acute flare | male   | 50         | 169        | 70         | 24.51               | 4.22                                      | 115             | 6.96                                       | 275                                | 67.1                     | 28.3                     | 6.3                    | 6                        | 0.3                    | 5.9           | 4.26          | 165                           | 628           |
| AG9       | Acute flare | male   | 31         | 173        | 75         | 25.86               | 4.69                                      | 144             | 5.26                                       | 205                                | 65.7                     | 25.3                     | 6.6                    | 0.7                      | 0.7                    | 6             | 5.48          | 87                            | 454           |
| AG10      | Acute flare | male   | 47         | 170        | 80         | 27.68               | 5.4                                       | 127             | 7.18                                       | 288                                | 63                       | 26.4                     | 6.2                    | 2                        | 0.4                    | 42.4          | 3.88          | 76                            | 302           |
| AG13      | Acute flare | male   | 64         | 170        | 80         | 27.68               | 5.74                                      | 114             | 6.3                                        | 207                                | 58.5                     | 29                       | 7.6                    | 2.6                      | 0.3                    | 22.8          | 6.51          | 111                           | 666           |
| AG15      | Acute flare | male   | 68         | 170        | 71         | 24.87               | 4.93                                      | 149             | 5.96                                       | 200                                | 49                       | 37                       | 10.5                   | 2.8                      | 0.7                    | 10.8          | 6.10          | 82                            | 546           |
| AG19      | Acute flare | male   | 64         | 170        | 66         | 22.84               | 3.36                                      | 92              | 7.23                                       | 310                                | 67.1                     | 24.6                     | 5.8                    | 2.4                      | 0.1                    | 37            | 13.9          | 173                           | 516           |
| AG17      | Acute flare | male   | 35         | 165        | 105        | 38.57               | 5.31                                      | 154             | 6.71                                       | 415                                | 67.8                     | 30.3                     | 6.4                    | 2.6                      | 0.9                    | 78.7          | 4.4           | 74                            | 723           |
| AG20      | Acute flare | male   | 67         | 176        | 71         | 22.82               | 4.33                                      | 134             | 4.27                                       | 188                                | 66.7                     | 33.2                     | 8                      | 1.6                      | 0.5                    | 9.2           | 4.7           | 138                           | 391           |
| AG18      | Acute flare | male   | 55         | 168        | 78         | 27.44               | 4.78                                      | 146             | 6.65                                       | 245                                | 47.6                     | 40.2                     | 6.1                    | 3.3                      | 0.3                    | 20.1          | 2.9           | 63                            | 316           |
| P3-B      | Remission   | male   | 23         | 175        | 65         | 27.76               | 4.97                                      | 147             | 6.91                                       | 221                                | 62.4                     | 28.9                     | 6                      | 2.4                      | 0.3                    | 6.8           | 2.54          | 72                            | 646           |
| G2        | Remission   | male   | 43         | 175        | 83         | 28.37               | 5.15                                      | 157             | 7.91                                       | 213                                | 66.7                     | 26.1                     | 6.8                    | 0.1                      | 0.5                    | 67            | 5.6           | 73                            | 487           |
| G7        | Remission   | male   | 77         | 165        | 82         | 30.12               | 4.38                                      | 148             | 5.98                                       | 247                                | 55.9                     | 30.8                     | 10.4                   | 2.2                      | 0.7                    | 64.1          | 5.9           | 77                            | 507           |
| G8        | Remission   | male   | 32         | 175        | 76         | 24.49               | 6.91                                      | 169             | 8.91                                       | 233                                | 61.5                     | 30.2                     | 5.6                    | 2.4                      | 0.3                    | 25.1          | 4.2           | 80                            | 454           |
| G9        | Remission   | male   | 34         | 173        | 76         | 25.39               | 5.4                                       | 164             | 6.38                                       | 223                                | 63.9                     | 28.8                     | 6.5                    | 0.5                      | 0.3                    | 40.5          | 4.7           | 86                            | 498           |
| G10       | Remission   | male   | 46         | 175        | 80         | 26.12               | 5.45                                      | 151             | 7.85                                       | 237                                | 65                       | 24                       | 5                      | 5.5                      | 0.5                    | 24.9          | 4.4           | 79                            | 369           |
| G13       | Remission   | male   | 55         | 170        | 65         | 22.49               | 5.01                                      | 164             | 5.87                                       | 185                                | 62.7                     | 26.1                     | 5.7                    | 1.1                      | 0.4                    | 24.2          | 6.7           | 129                           | 622           |
| RG42      | Remission   | male   | 40         | 179        | 84         | 24.84               | 4.9                                       | 149             | 6.2                                        | 233                                | 48.9                     | 42.8                     | 6.3                    | 2.8                      | 0.6                    | 60.7          | 4.8           | 77                            | 493           |
| RG43      | Remission   | male   | 56         | 165        | 65.5       | 25.16               | 4.19                                      | 112             | 7.47                                       | 165                                | 75.7                     | 19.7                     | 5.3                    | 0.4                      | 0.1                    | 5.7           | 14            | 220                           | 596           |
| RG2       | Remission   | male   | 35         | 178        | 78         | 24.82               | 4.68                                      | 148             | 8.88                                       | 283                                | 67.6                     | 32                       | 6                      | 2.1                      | 0.3                    | 31            | 3.3           | 62                            | 645           |
| G22       | Remission   | male   | 45         | 180        | 76         | 23.46               | 5.21                                      | 159             | 5.87                                       | 273                                | 69.1                     | 26.6                     | 4.4                    | 0.7                      | 0                      | 21.9          | 4.87          | 82.6                          | 473.3         |
| G23       | Remission   | male   | 53         | 181        | 95         | 29.00               | 5.26                                      | 159             | 5.87                                       | 229                                | 59.8                     | 32.2                     | 6.6                    | 0.9                      | 0.5                    | 24.6          | 6.7           | 87                            | 732           |
| RG28      | Remission   | male   | 33         | 180        | 86         | 26.32               | 5.4                                       | 157             | 5.26                                       | 255                                | 47                       | 36.9                     | 11.8                   | 3                        | 1.3                    | 16.5          | 5.4           | 79                            | 556           |
| RG29      | Remission   | male   | 52         | 170        | 70         | 24.22               | 4.75                                      | 153             | 6.29                                       | 226                                | 62                       | 27.2                     | 7.1                    | 2.1                      | 0.6                    | 36            | 6.7           | 93                            | 591           |
| RG30      | Remission   | male   | 27         | 168        | 88         | 31.18               | 4.97                                      | 154             | 6.96                                       | 247                                | 49.1                     | 41.8                     | 6.5                    | 2.1                      | 0.5                    | 68.8          | 3.3           | 99                            | 507           |
| RG31      | Remission   | male   | 76         | 172        | 75         | 25.35               | 3.25                                      | 111             | 5.66                                       | 157                                | 67.9                     | 22.6                     | 7.4                    | 1.4                      | 0.5                    | 12.5          | 10.4          | 122                           | 486           |
| RG9       | Remission   | male   | 71         | 165        | 80         | 29.36               | 4.53                                      | 105             | 10.57                                      | 289                                | 48.2                     | 40.2                     | 7                      | 2.9                      | 0.7                    | 11.5          | 6.9           | 121                           | 372           |
| RG11      | Remission   | male   | 45         | 174        | 70         | 23.12               | 5.13                                      | 146             | 5.58                                       | 209                                | 65.6                     | 33.4                     | 6.7                    | 1.7                      | 0.6                    | 21.5          | 4.6           | 92                            | 403           |
| RG14      | Remission   | male   | 55         | 182        | 84         | 25.86               | 5.04                                      | 164             | 7.71                                       | 212                                | 75.9                     | 17.2                     | 5.8                    | 1                        | 0.1                    | 22.5          | 4.1           | 104.6                         | 923           |
| RG15      | Remission   | male   | 68         | 174        | 85         | 28.88               | 4.16                                      | 128             | 6.25                                       | 234                                | 64.9                     | 25.1                     | 7.5                    | 1.9                      | 0.6                    | 22.6          | 7.8           | 141                           | 446           |
| RG29      | Remission   | male   | 54         | 172        | 80         | 27.84               | 5.85                                      | 165             | 6.91                                       | 188                                | 64.5                     | 27.7                     | 6.3                    | 2.1                      | 0.4                    | 40.3          | 5.1           | 72                            | 497           |
| RG1       | Remission   | male   | 56         | 177        | 78.8       | 25.15               | 4.63                                      | 149             | 7.2                                        | 175                                | 68.4                     | 27.1                     | 10.4                   | 3.3                      | 0.8                    | 19.3          | 6             | 74                            | 535           |
| RG2       | Remission   | male   | 56         | 170        | 73.4       | 23.17               | 4.15                                      | 126             | 6.27                                       | 180                                | 62.9                     | 32.9                     | 10.5                   | 2.9                      | 0.9                    | 37            | 6.6           | 81                            | 411           |
| RG3       | Remission   | male   | 59         | 168        | 75         | 24.49               | 6.26                                      | 126             | 4.42                                       | 217                                | 74.4                     | 16.6                     | 7.7                    | 1                        | 0.3                    | 21            | 9.5           | 120                           | 458           |
| RG4       | Remission   | male   | 56         | 173        | 65         | 21.72               | 5.1                                       | 155             | 5.91                                       | 189                                | 61.7                     | 30.5                     | 5.5                    | 3.5                      | 0.3                    | 22.7          | 4             | 95                            | 664           |
| RG5       | Remission   | male   | 65         | 169        | 74         | 25.91               | 4.93                                      | 168             | 4.65                                       | 135                                | 66.1                     | 26.5                     | 6.2                    | 2.5                      | 0.7                    | 14.1          | 5.3           | 112                           | 605           |
| RG6       | Remission   |        |            |            |            |                     |                                           |                 |                                            |                                    |                          |                          |                        |                          |                        |               |               |                               |               |



**Supplemental Table 8 Antibodies for cell staining required by flow cytometry**

| <b>Celltype</b>                              | <b>Marker</b>                                                                                                                 |
|----------------------------------------------|-------------------------------------------------------------------------------------------------------------------------------|
| Leukocyte                                    | CD45 <sup>+</sup>                                                                                                             |
| Myeloid cell                                 | CD45 <sup>+</sup> CD11b <sup>+</sup>                                                                                          |
| Classical monocyte                           | CD45 <sup>+</sup> CD11b <sup>+</sup> CD14 <sup>+</sup> CD16 <sup>-</sup>                                                      |
| Non-classical monocyte                       | CD45 <sup>+</sup> CD11b <sup>+</sup> CD16 <sup>+</sup> CD14 <sup>-</sup>                                                      |
| HLA-DQA1 <sup>+</sup> classical monocyte     | CD45 <sup>+</sup> CD11b <sup>+</sup> CD14 <sup>+</sup> CD16 <sup>-</sup> HLA-DQA1 <sup>+</sup>                                |
| HLA-DQA1 <sup>+</sup> non-classical monocyte | CD45 <sup>+</sup> CD11b <sup>+</sup> CD16 <sup>+</sup> CD14 <sup>-</sup> HLA-DQA1 <sup>+</sup>                                |
| T cells                                      | CD45 <sup>+</sup> CD3 <sup>+</sup>                                                                                            |
| CD4 <sup>+</sup> T cells                     | CD45 <sup>+</sup> CD3 <sup>+</sup> CD4 <sup>+</sup>                                                                           |
| Th1 cells                                    | CD45 <sup>+</sup> CD3 <sup>+</sup> CD4 <sup>+</sup> CXCR5 <sup>-</sup> CXCR3 <sup>+</sup> CCR4 <sup>-</sup>                   |
| Th2 cells                                    | CD45 <sup>+</sup> CD3 <sup>+</sup> CD4 <sup>+</sup> CXCR5 <sup>-</sup> CXCR3 <sup>-</sup> CCR4 <sup>+</sup>                   |
| Th17 cells                                   | CD45 <sup>+</sup> CD3 <sup>+</sup> CD4 <sup>+</sup> CXCR5 <sup>-</sup> CXCR3 <sup>-</sup> CCR4 <sup>+</sup> CCR6 <sup>+</sup> |
| Treg cells                                   | CD45 <sup>+</sup> CD3 <sup>+</sup> CD4 <sup>+</sup> CD25 <sup>+</sup> CD127 <sup>-</sup>                                      |

**Supplemental Table 9 the source for commercial antibodies**

| <b>Antibody</b>             | <b>source</b> | <b>catalog number</b> |
|-----------------------------|---------------|-----------------------|
| CD45-FITC                   | BD Pharmingen | 555482                |
| Fixable viability stain 780 | BD Pharmingen | 565388                |
| CD11B-PerCP-Cy5.5           | BioLegend     | 393106                |
| CD14-APC                    | BD Pharmingen | 555399                |
| CD16-PE-Cy7                 | BD Pharmingen | 560716                |
| HLA-DQA1-PE                 | Novus         | NBP3-08747PE          |
| CD3-PerCP-Cy5.5             | BD Pharmingen | 560835                |
| CD4-APC-H7                  | BD Pharmingen | 560158                |
| CXCR5-AF647                 | BD Pharmingen | 558113                |
| CXCR3-AF488                 | BD Pharmingen | 558047                |
| CCR4-BV421                  | BD Pharmingen | 562579                |
| CCR6-BV510                  | BD Pharmingen | 563241                |
| CD25-PE                     | BD Pharmingen | 555432                |
| CD127-BV421                 | BD Pharmingen | 562436                |
